# Supplementary material for: Self-assembly of a novel multicomponent polyoxometalate-based tetrahedral supercluster with high catalytic activity for thioether oxidation
Source: Royal Society of Chemistry journal article supplement (doi:10.1039/d2cc02748h), 2022-01-01
Supplement: d2cc02748h1.pdf [file d2cc02748h1.pdf]

# Self-assembly of a novel multicomponent polyoxometalate-based tetrahedral supercluster with high catalytic activity for thioether oxidation

Xiaodong Liu, Na Xu\*, Xiaohui Liu, Yanyan Guo, Xiuli Wang\*

*College of Chemistry and Materials Engineering, Bohai University, Liaoning Professional Technology Innovation Center of Liaoning Province for Conversion Materials of Solar Cell, Jinzhou 121013, P. R. China*

## Experimental details.

**Table S1.** Crystal data and structure refinement for compound **1**.

**Fig. S1.** a)–b) Potential active coordination sites for  $\{P_6Mo_{18}\}$ .

**Fig. S2** a)– c) Structural correlation in the novel  $P_6Co_2Mo_{16}$ , classical  $P_6Mo_{18}$ , and isolated  $P_6Mo_{16}$ .  $MoO_6$ : wathet blue octahedra;  $PO_4$ : yellow tetrahedron; Mo, wathet blue spheres; Co, pink spheres; O, red spheres; Pb, dark yellow spheres.

**Fig. S3** Crystals of **1** under an optical microscope (Magnification information: 4.5\*10)

**Fig. S4** IR spectrum of **1**

**Fig. S5.** Simulated and experimental PXRD patterns of **1** in the characteristic regions of a) 5-50 degree; b) 5-20 degree; c) 25-30 degree.

**Fig. S6.** The TG curve of **1**.

**Fig. S7** The simplified diagram of 3D supramolecular framework of compound **1** (The pink ball represents cluster **1a**; the blue ball represents Hbiz ligand).

**Fig. S8.** a)–b) Ball-and-stick model and dimension of **1a** established by X-ray crystallography. H atoms are omitted for clarity. Atoms colored wathet blue, dark blue, pink, dark yellow, yellow, and red, correspond to  $Mo^V$ ,  $Mo^{VI}$ , Co, Pb, P, and O.

**Fig. S9.** The XPS pattern for a) Mo; b) Co; c) Pb.

**Fig. S10.** a) The distance between the two metal atoms at the bottom of the basket handle of  $P_6Mo_{18}$ ; b) The distance between the two metal atoms at the bottom of the basket handle of  $P_6Co_2Mo_{16}$ .

**Fig. S11.** PXRD spectra of **1** before and after five runs catalytic reactions in the characteristic regions of a) 5-50 degree; b) 5-20 degree; c) 25-30 degree.

**Fig. S12.** Raman spectra of **1** before and after treating with TBHP.

**Table S2.** The bond angle (deg) range in compound **1**.

**Table S3.** The bond length (Å) range in compound **1**.

**Table S4.** Selected hydrogen bonding geometry (Å, °) for compound **1**.

**Table S5.** BVS values for Pb, Mo, and Co atoms in **1**.

**Table S6.** Comparison of POM-based crystalline heterogeneous catalytic systems for methyl phenyl sulfide oxidation.

**Table S7.** Oxidation of methyl phenyl sulfide to methyl phenyl sulfoxide catalyzed by compound **1** under different solvents.

**Table S8.** Catalytic oxidation of methyl phenyl sulfide with different catalysts.

**Table S9.** ICP analysis of the filtrate after the removal of the catalyst.

**Table S10.** Selective oxidation of various sulfides to sulfoxide.

## Experimental details.

### 1. Materials and general methods:

All chemical materials were commercially purchased without further purification. Infrared (IR) spectra (KBr pellet) were performed on a Varian 640 FTIR FT-IR infrared spectrophotometer in the range of 400-4000  $\text{cm}^{-1}$  (Fig. S2). Powder X-ray diffraction (PXRD) patterns were recorded on a D/teX Ultra diffractometer with Cu  $K\alpha$  radiation ( $\lambda = 1.5418 \text{ \AA}$ ). Simulated XRD data were simulated by the Mercury Software with the step of  $0.02^\circ$  from  $5^\circ$  to  $50^\circ$ . Thermogravimetric analyses were conducted using a Hitachi TG/DTA7200 analyzer in an  $\text{N}_2$ -flow atmosphere with a heating rate of  $10^\circ\text{C}/\text{min}$  at a temperature of  $25\text{-}800^\circ\text{C}$ . X-ray photoelectron spectrum (XPS) was measured using a Thermo Scientific K-Alpha photoelectron spectrometer. The catalytic reaction was analyzed by using a Shimadzu Tech-comp GC-7900 gas chromatograph (GC) with a flame ionization detector equipped with a TM-5 Sil capillary column. The quantitative analyses of Mo, Co and Pb elements and the filtrate after the removal of the catalyst were achieved by Perkin Elmer NexION 300X inductively coupled plasma optical emission spectrometer (ICP).

### 2. Synthesis

**Synthesis of 1:** A mixture of  $\text{Na}_2\text{MoO}_4 \cdot 2\text{H}_2\text{O}$  (0.500g, 2.067 mmol),  $\text{CoCl}_2 \cdot 6\text{H}_2\text{O}$  (0.200 g, 0.841 mmol),  $\text{Pb}(\text{OAc})_2 \cdot 3\text{H}_2\text{O}$  (0.100g, 0.264 mmol),  $\text{H}_3\text{PO}_4$  (0.56 ml, 10 mmol), benzimidazole (0.118 g, 1 mmol) were dissolved in a mixed solution of EtOH/ $\text{H}_2\text{O}$  (6mL, v:v = 1:5). After being stirred for 35 min at room temperature and then adjusted with 1 M NaOH solution to pH=1.9, Then the above mixture was placed into a 25 ml Teflon reactor and heated at  $160^\circ\text{C}$  for 4 days, finally cooled to room temperature. Black block crystals of **1** were isolated. Yield:  $\sim 82 \text{ mg}$  (16.32 % based on  $\text{Na}_2\text{MoO}_4 \cdot 2\text{H}_2\text{O}$ ). IR (KBr pellet,  $\text{cm}^{-1}$ , Fig. S2): 3543(w), 3143(s), 2969(w), 2865(w), 2364(w), 1615(m), 1543(w), 1506(w), 1448(m), 1370(w), 1234(m), 1112(w), 1048(s), 994(s), 812(w), 753(s), 622(m), 572(m), 482(m).

### 3. X-ray crystallography

The intensity data of the compound were collected on a Bruker Apex CCD II area detector diffractometer with graphite-monochromated Mo  $K\alpha$  radiation ( $\lambda = 0.71073 \text{ \AA}$ ) at 173 K. Absorption corrections were applied using multiscan techniques. The structure was solved by direct methods and refined by full-matrix least-squares techniques using the SHELXL program<sup>1-3</sup>. The contribution of disordered solvent molecules to the overall intensity data of structure was treated using the SQUEEZE method in PLATON. Crystallographic data for compound **1** is summarized in Table S1. The bond length ( $\text{\AA}$ ) and angle (deg) range of compound **1** is listed in Table S2-S3. BVS result of compound **1** is listed in Table S4. The crystallographic data have been deposited with the Cambridge Crystallographic Data Centre (CCDC) as entry 2166179.

### 4. Catalytic oxidation of thioether

The substrate thioether (0.5 mmol), powder catalyst **1** ( $3 \times 10^{-4}$  mmol), EtOH as solvent (3 ml), tert-butyl hydroperoxide (TBHP, 0.65 mmol, 70% aqueous solution), and internal standard naphthalene (15 mg) were added into the sealed reaction vessel at room temperature and stirred for 60 min under  $60^\circ\text{C}$ . The yield of the product was determined by GC. At the end of the reaction, the mixture was rinsed with EtOH, and the remaining powder was dried in the air and used in the cycle reaction.

**Table S1.** Crystal data and structure refinement for compound **1**.

| Compound <b>1</b>                    |                                                                                                                                     |
|--------------------------------------|-------------------------------------------------------------------------------------------------------------------------------------|
| Empirical formula                    | C <sub>84</sub> H <sub>342</sub> Co <sub>12</sub> Mo <sub>80</sub> N <sub>24</sub> O <sub>489</sub> P <sub>36</sub> Pb <sub>4</sub> |
| Formula weight                       | 19839.84                                                                                                                            |
| Crystal system                       | Monoclinic                                                                                                                          |
| Space group                          | C2/c                                                                                                                                |
| T (K)                                | 173                                                                                                                                 |
| a (Å)                                | 30.9076(13)                                                                                                                         |
| b (Å)                                | 57.925(2)                                                                                                                           |
| c (Å)                                | 32.2149(16)                                                                                                                         |
| α(°)                                 | 90                                                                                                                                  |
| β(°)                                 | 109.355(2)                                                                                                                          |
| γ(°)                                 | 90                                                                                                                                  |
| V (Å <sup>3</sup> )                  | 54416(4)                                                                                                                            |
| Z                                    | 4                                                                                                                                   |
| D <sub>c</sub> (Mg m <sup>-3</sup> ) | 2.136                                                                                                                               |
| μ (mm <sup>-1</sup> )                | 3.555                                                                                                                               |
| F(000)                               | 32720                                                                                                                               |
| Reflections collected / unique       | 292167 / 48305 [R(int) = 0.0624]                                                                                                    |
| Data / restraints / parameters       | 48305 / 714 / 2658                                                                                                                  |
| GOF                                  | 1.033                                                                                                                               |
| R index [I > 2σ(I)]                  | R <sub>1</sub> = 0.0444, wR <sub>2</sub> = 0.1081                                                                                   |
| R (all data)                         | R <sub>1</sub> = 0.0632, wR <sub>2</sub> = 0.1191                                                                                   |

$$R_1 = \frac{\sum ||F_o| - |F_c||}{\sum |F_o|}; wR_2 = \left\{ \frac{\sum [w(F_o^2 - F_c^2)^2]}{\sum [w(F_o^2)^2]} \right\}^{1/2}$$

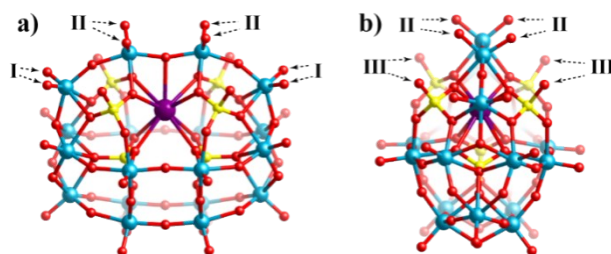**Fig. S1.**a) –b) Potential active coordination sites for P<sub>6</sub>Mo<sub>18</sub>.

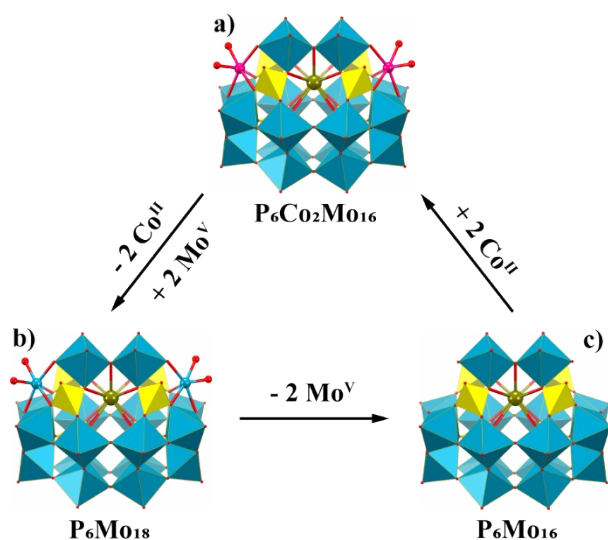

**Fig. S2** a)– c) Structural correlation in the novel  $\text{P}_6\text{Co}_2\text{Mo}_{16}$ , classical  $\text{P}_6\text{Mo}_{18}$ , and isolated  $\text{P}_6\text{Mo}_{16}$ .  $\text{MoO}_6$ : wathet blue octahedra;  $\text{PO}_4$ : yellow tetrahedron; Mo, wathet blue spheres; Co, pink spheres; O, red spheres; Pb, dark yellow spheres.

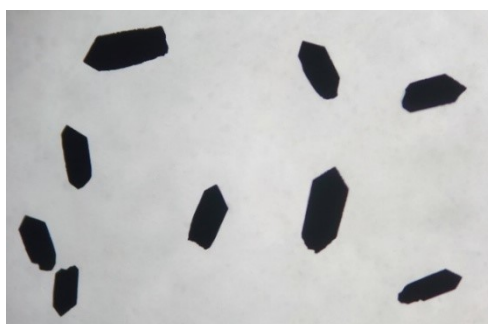

**Fig. S3** Crystals of **1** under an optical microscope (Magnification information:  $4.5 \times 10$ )

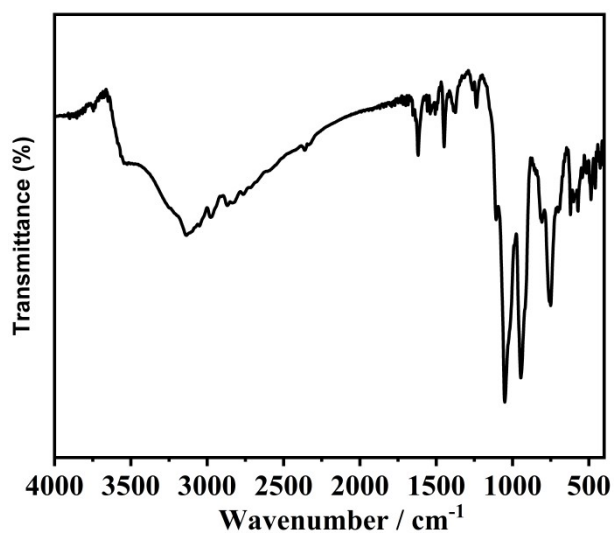

**Fig. S4** IR spectrum of **1**

The FT-IR spectrum of **1** was recorded in the range of  $4000\text{--}500\text{ cm}^{-1}$  using KBr pellets. Strong

bands located at  $3543$  and  $1615\text{cm}^{-1}$  are assigned to  $\nu(\text{O-H})$  stretching and bending vibrations of water molecules. The peaks at  $1048$ ,  $994$ ,  $812$ , and  $753\text{cm}^{-1}$  are attributed to  $\nu(\text{P-O}_a)$ ,  $\nu(\text{Mo=O}_{\text{terminal}})$ , and  $\nu(\text{Mo-O}_{\text{bridge}})$  vibrations, respectively. The peaks located at  $572$  and  $622\text{cm}^{-1}$  can be attributed to  $\nu(\text{Mo-O})$ . The peaks at  $1448\text{cm}^{-1}$  is attributed to  $\nu(\text{C-N})$  vibrations.

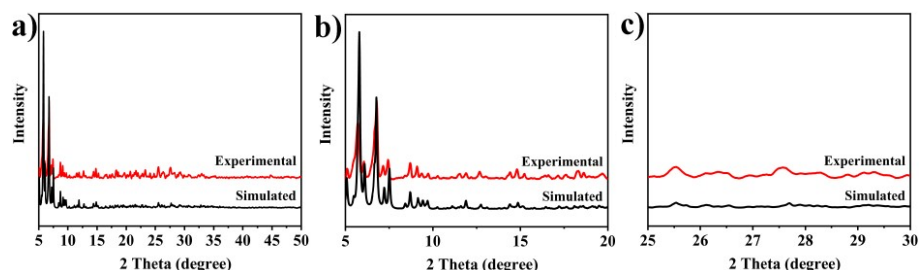

**Fig. S5.** Simulated and experimental PXRD patterns of **1** in the characteristic regions of a) 5-50 degree; b) 5-20 degree; c) 25-30 degree.

The phase purity of **1** was determined by the good consistency between the experimental and simulated PXRD patterns. The difference in intensity between the experimental and simulated PXRD patterns may be due to the change in the preferred orientation of the powder samples during the acquisition of the experimental PXRD patterns.

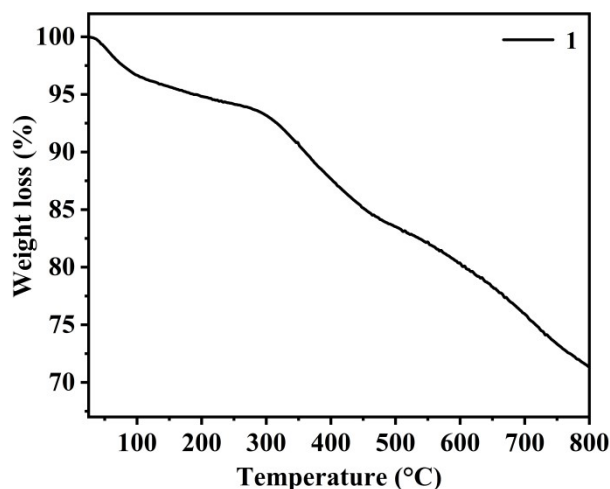

**Fig. S6.** The TG curve of **1**.

For the sake of exploring the thermal stability of compound **1**, the TG measurement was carried out from 25 to 800 °C under an  $\text{N}_2$  atmosphere at a heating rate of  $10\text{ °C min}^{-1}$ . The TG curve suggests that compound **1** undergoes a two-step weight loss (Figure S5). The first weight loss from 25 to 157 °C of 4.52 % (calcd. 4.45 %) is attributed to the liberation of 49 lattice water molecules. Upon heating to 390 °C, the second weight loss of 7.22 % (calcd. 7.26 %) is attributed to 80 lattice water molecules.

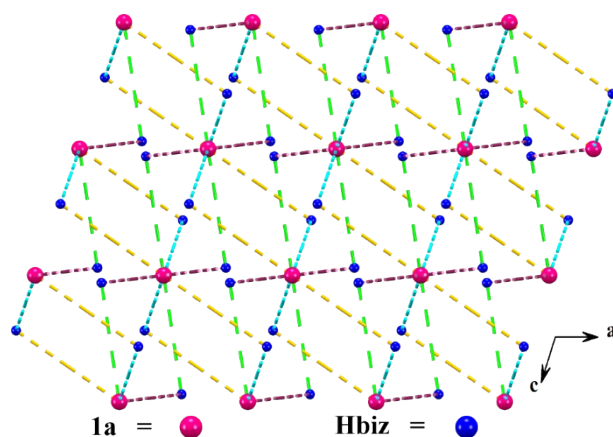

**Fig. S7** The simplified diagram of 3D supramolecular framework of compound **1** (The pink ball represents cluster **1a**; the blue ball represents Hbiz ligand).

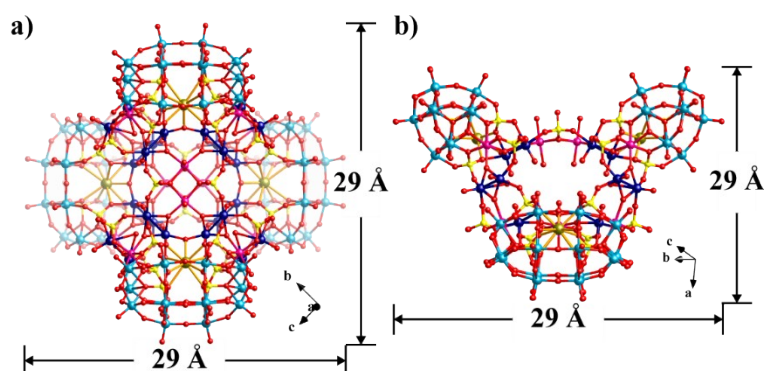

**Fig. S8.** a)–b) Ball-and-stick model and dimension of **1a** established by X-ray crystallography. H atoms are omitted for clarity. Atoms colored with light blue, dark blue, pink, dark yellow, yellow, and red, correspond to Mo<sup>V</sup>, Mo<sup>VI</sup>, Co, Pb, P, and O.

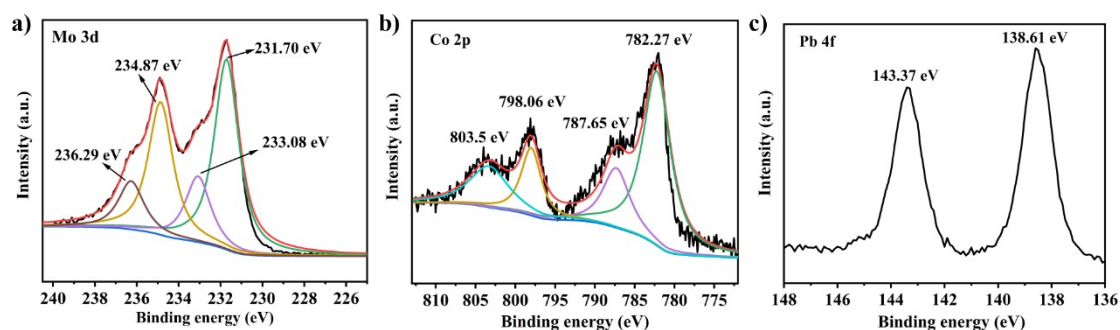

**Fig. S9.** The XPS pattern for a) Mo; b) Co; c) Pb.

The XPS studies on **1** were conducted to identify the oxidation states of Mo, Co, and Pb atoms. The XPS spectrum for Mo atoms displays two peaks at 233.08 and 231.70 eV in the energy region of Mo 3d<sub>5/2</sub>, and two peaks at 236.29 and 234.87 eV in the energy region of Mo 3d<sub>3/2</sub>. The peaks at 231.70 and 234.87 eV are typical for the Mo<sup>V</sup> ions;<sup>4</sup> whereas the Mo<sup>VI</sup> ions are labeled with the characteristic peaks at 236.29 and 233.08 eV,<sup>5</sup> illustrating that Mo<sup>VI</sup> ions in the starting materials are partially reduced to Mo<sup>V</sup> ions in the synthetic procedure.

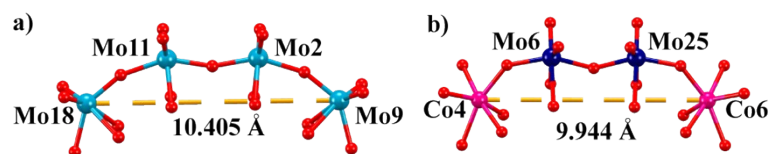

**Fig. S10.** a) The distance between the two metal atoms at the bottom of the basket handle of  $P_6Mo_{18}$ ; b) The distance between the two metal atoms at the bottom of the basket handle of  $P_6Co_2Mo_{16}$ .

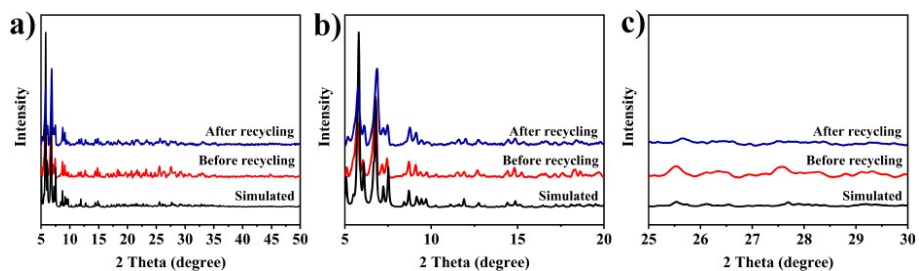

**Fig. S11.** PXRD spectra of **1** before and after five runs catalytic reactions in the characteristic regions of a) 5-50 degree; b) 5-20 degree; c) 25-30 degree.

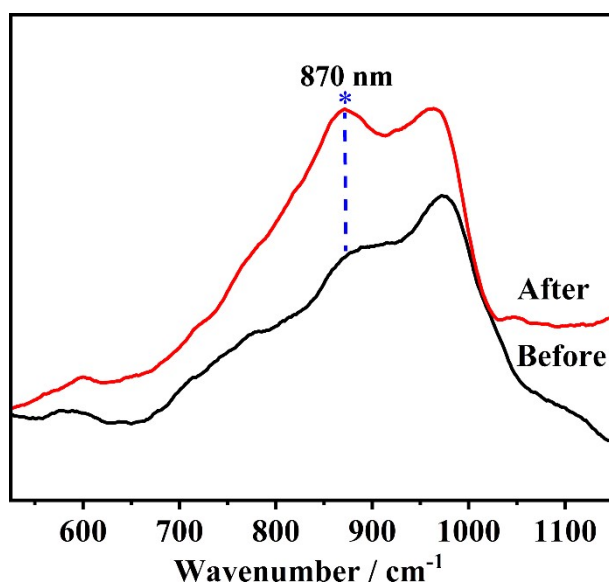

**Fig. S12.** Raman spectra of **1** before and after treating with TBHP.



**Table S2.** The bond angle (deg) range in compound **1**.

| Bond                | Angle (°)  | Bond                | Angle (°) | Bond                 | Angle (°)  | Bond                 | Angle (°) |
|---------------------|------------|---------------------|-----------|----------------------|------------|----------------------|-----------|
| O(8)-Pb(1)-O(29)    | 88.89(15)  | O(26)-Mo(12)-O(9)   | 85.95(19) | O(133)-Mo(25)-O(69)  | 104.1(3)   | O(166)-Mo(39)-O(116) | 155.9(3)  |
| O(13)-Pb(1)-O(8)    | 123.26(16) | O(41)-Mo(12)-O(9)   | 72.56(19) | O(133)-Mo(25)-O(96)  | 99.8(3)    | O(166)-Mo(39)-O(126) | 95.1(3)   |
| O(13)-Pb(1)-O(14)   | 91.13(16)  | O(41)-Mo(12)-O(26)  | 76.5(2)   | O(133)-Mo(25)-O(169) | 172.0(3)   | O(166)-Mo(39)-O(139) | 88.2(3)   |
| O(13)-Pb(1)-O(29)   | 63.31(16)  | O(47)-Mo(12)-O(9)   | 83.9(2)   | O(133)-Mo(25)-O(179) | 96.1(3)    | O(177)-Mo(39)-O(90)  | 164.5(3)  |
| O(14)-Pb(1)-O(8)    | 63.46(16)  | O(47)-Mo(12)-O(26)  | 85.0(2)   | O(169)-Mo(25)-Mo(34) | 87.11(15)  | O(177)-Mo(39)-O(116) | 96.6(3)   |
| O(14)-Pb(1)-O(29)   | 123.74(16) | O(47)-Mo(12)-O(41)  | 150.8(2)  | O(179)-Mo(25)-Mo(34) | 135.57(16) | O(177)-Mo(39)-O(126) | 104.4(3)  |
| O(22)-Pb(1)-O(8)    | 60.20(15)  | O(47)-Mo(12)-O(75)  | 97.7(2)   | O(179)-Mo(25)-O(169) | 75.9(2)    | O(177)-Mo(39)-O(139) | 96.6(3)   |
| O(22)-Pb(1)-O(13)   | 63.06(16)  | O(75)-Mo(12)-O(9)   | 74.8(2)   | O(87)-Mo(26)-O(31)   | 79.3(2)    | O(177)-Mo(39)-O(166) | 104.6(3)  |
| O(22)-Pb(1)-O(14)   | 63.51(16)  | O(75)-Mo(12)-O(26)  | 160.1(2)  | O(88)-Mo(26)-O(31)   | 72.5(2)    | O(110)-Mo(40)-O(90)  | 73.1(2)   |
| O(22)-Pb(1)-O(29)   | 60.24(16)  | O(75)-Mo(12)-O(41)  | 92.7(2)   | O(88)-Mo(26)-O(87)   | 83.6(2)    | O(110)-Mo(40)-O(180) | 77.0(2)   |
| O(32)-Pb(2)-O(34)   | 62.98(17)  | O(100)-Mo(12)-O(9)  | 171.7(2)  | O(141)-Mo(26)-O(31)  | 169.4(3)   | O(116)-Mo(40)-O(90)  | 75.3(3)   |
| O(32)-Pb(2)-O(49)   | 63.15(17)  | O(100)-Mo(12)-O(26) | 97.8(2)   | O(141)-Mo(26)-O(87)  | 92.0(3)    | O(116)-Mo(40)-O(110) | 91.5(3)   |
| O(32)-Pb(2)-O(169)  | 90.80(18)  | O(100)-Mo(12)-O(41) | 101.0(2)  | O(141)-Mo(26)-O(88)  | 100.8(3)   | O(116)-Mo(40)-O(180) | 160.5(3)  |
| O(32)-Pb(2)-O(179)  | 122.62(17) | O(100)-Mo(12)-O(47) | 103.7(3)  | O(141)-Mo(26)-O(161) | 100.7(3)   | O(149)-Mo(40)-O(90)  | 83.4(3)   |
| O(34)-Pb(2)-O(49)   | 59.33(18)  | O(100)-Mo(12)-O(75) | 100.6(3)  | O(141)-Mo(26)-O(167) | 100.3(3)   | O(149)-Mo(40)-O(110) | 151.0(3)  |
| O(34)-Pb(2)-O(169)  | 63.65(18)  | O(30)-Mo(13)-Mo(16) | 49.12(16) | O(161)-Mo(26)-O(31)  | 88.0(2)    | O(149)-Mo(40)-O(116) | 98.9(3)   |
| O(34)-Pb(2)-O(179)  | 59.65(16)  | O(30)-Mo(13)-O(65)  | 153.7(2)  | O(161)-Mo(26)-O(87)  | 167.3(2)   | O(149)-Mo(40)-O(180) | 84.8(2)   |
| O(169)-Pb(2)-O(49)  | 122.97(17) | O(30)-Mo(13)-O(84)  | 86.7(2)   | O(161)-Mo(26)-O(88)  | 92.4(2)    | O(154)-Mo(40)-O(90)  | 171.0(3)  |
| O(169)-Pb(2)-O(179) | 63.53(18)  | O(30)-Mo(13)-O(170) | 68.7(2)   | O(161)-Mo(26)-O(167) | 91.2(3)    | O(154)-Mo(40)-O(110) | 99.8(3)   |
| O(179)-Pb(2)-O(49)  | 88.12(17)  | O(50)-Mo(13)-Mo(16) | 49.02(15) | O(167)-Mo(26)-O(31)  | 85.5(2)    | O(154)-Mo(40)-O(116) | 99.7(3)   |
| O(6)-Mo(1)-Mo(3)    | 48.56(14)  | O(50)-Mo(13)-O(30)  | 98.1(2)   | O(167)-Mo(26)-O(87)  | 88.1(2)    | O(154)-Mo(40)-O(149) | 105.0(3)  |
| O(6)-Mo(1)-O(8)     | 87.40(19)  | O(50)-Mo(13)-O(65)  | 86.0(2)   | O(167)-Mo(26)-O(88)  | 157.5(2)   | O(154)-Mo(40)-O(180) | 97.8(3)   |
| O(6)-Mo(1)-O(14)    | 81.18(19)  | O(50)-Mo(13)-O(84)  | 146.8(2)  | O(62)-Mo(27)-O(83)   | 83.3(2)    | O(180)-Mo(40)-O(90)  | 86.2(2)   |

|                   |            |                      |            |                      |          |                   |            |
|-------------------|------------|----------------------|------------|----------------------|----------|-------------------|------------|
| O(8)-Mo(1)-Mo(3)  | 135.22(13) | O(50)-Mo(13)-O(170)  | 68.4(2)    | O(111)-Mo(27)-O(62)  | 76.0(2)  | O(5)-Co(1)-O(7)   | 173.7(2)   |
| O(8)-Mo(1)-O(14)  | 75.51(19)  | O(65)-Mo(13)-Mo(16)  | 130.24(15) | O(111)-Mo(27)-O(83)  | 72.9(2)  | O(5)-Co(1)-O(19)  | 73.21(19)  |
| O(14)-Mo(1)-Mo(3) | 88.18(13)  | O(65)-Mo(13)-O(84)   | 76.4(2)    | O(123)-Mo(27)-O(62)  | 159.1(3) | O(6)-Co(1)-O(5)   | 89.36(19)  |
| O(16)-Mo(1)-Mo(3) | 48.37(15)  | O(65)-Mo(13)-O(170)  | 89.2(2)    | O(123)-Mo(27)-O(83)  | 76.3(2)  | O(6)-Co(1)-O(7)   | 87.04(19)  |
| O(16)-Mo(1)-O(6)  | 95.8(2)    | O(84)-Mo(13)-Mo(16)  | 127.99(15) | O(123)-Mo(27)-O(111) | 93.6(3)  | O(6)-Co(1)-O(11)  | 103.5(2)   |
| O(16)-Mo(1)-O(8)  | 159.4(2)   | O(84)-Mo(13)-O(170)  | 83.2(2)    | O(123)-Mo(27)-O(178) | 98.7(3)  | O(6)-Co(1)-O(19)  | 162.2(2)   |
| O(16)-Mo(1)-O(14) | 84.9(2)    | O(128)-Mo(13)-Mo(16) | 107.2(2)   | O(168)-Mo(27)-O(62)  | 97.6(3)  | O(11)-Co(1)-O(5)  | 92.7(2)    |
| O(22)-Mo(1)-Mo(3) | 138.13(15) | O(128)-Mo(13)-O(30)  | 100.7(3)   | O(168)-Mo(27)-O(83)  | 172.4(3) | O(11)-Co(1)-O(7)  | 83.13(19)  |
| O(22)-Mo(1)-O(6)  | 155.9(2)   | O(128)-Mo(13)-O(50)  | 104.4(3)   | O(168)-Mo(27)-O(111) | 100.0(3) | O(11)-Co(1)-O(19) | 74.3(2)    |
| O(22)-Mo(1)-O(8)  | 78.5(2)    | O(128)-Mo(13)-O(65)  | 103.4(2)   | O(168)-Mo(27)-O(123) | 102.1(3) | O(19)-Co(1)-O(7)  | 109.96(19) |
| O(22)-Mo(1)-O(14) | 76.5(2)    | O(128)-Mo(13)-O(84)  | 106.9(2)   | O(168)-Mo(27)-O(178) | 103.5(3) | O(46)-Co(1)-O(5)  | 92.8(2)    |
| O(22)-Mo(1)-O(16) | 91.1(2)    | O(128)-Mo(13)-O(170) | 165.3(2)   | O(178)-Mo(27)-O(62)  | 83.3(2)  | O(46)-Co(1)-O(6)  | 97.4(2)    |
| O(76)-Mo(1)-Mo(3) | 99.15(19)  | O(170)-Mo(13)-Mo(16) | 58.26(13)  | O(178)-Mo(27)-O(83)  | 84.1(2)  | O(46)-Co(1)-O(7)  | 92.7(2)    |
| O(76)-Mo(1)-O(6)  | 99.7(2)    | O(15)-Mo(14)-O(9)    | 83.58(18)  | O(178)-Mo(27)-O(111) | 150.4(3) | O(46)-Co(1)-O(11) | 158.4(2)   |
| O(76)-Mo(1)-O(8)  | 95.5(2)    | O(35)-Mo(14)-O(9)    | 83.9(2)    | O(57)-Mo(28)-O(20)   | 78.4(2)  | O(46)-Co(1)-O(19) | 87.4(2)    |
| O(76)-Mo(1)-O(14) | 171.0(2)   | O(35)-Mo(14)-O(15)   | 83.2(2)    | O(98)-Mo(28)-O(20)   | 85.4(2)  | O(15)-Co(2)-O(26) | 92.79(19)  |
| O(76)-Mo(1)-O(16) | 103.9(2)   | O(35)-Mo(14)-O(41)   | 149.6(2)   | O(98)-Mo(28)-O(57)   | 92.5(2)  | O(15)-Co(2)-O(41) | 73.17(19)  |
| O(76)-Mo(1)-O(22) | 101.0(2)   | O(35)-Mo(14)-O(82)   | 98.6(2)    | O(98)-Mo(28)-O(102)  | 92.8(3)  | O(15)-Co(2)-O(50) | 83.38(19)  |
| O(13)-Mo(2)-Mo(7) | 87.97(12)  | O(41)-Mo(14)-O(9)    | 72.59(19)  | O(98)-Mo(28)-O(178)  | 167.9(3) | O(24)-Co(2)-O(15) | 103.1(2)   |
| O(18)-Mo(2)-Mo(7) | 48.44(15)  | O(41)-Mo(14)-O(15)   | 75.4(2)    | O(102)-Mo(28)-O(20)  | 84.8(2)  | O(24)-Co(2)-O(26) | 88.2(2)    |
| O(18)-Mo(2)-O(13) | 84.8(2)    | O(68)-Mo(14)-O(9)    | 172.7(2)   | O(102)-Mo(28)-O(57)  | 162.0(2) | O(24)-Co(2)-O(41) | 158.8(2)   |
| O(18)-Mo(2)-O(24) | 95.9(2)    | O(68)-Mo(14)-O(15)   | 98.0(2)    | O(102)-Mo(28)-O(178) | 88.0(2)  | O(24)-Co(2)-O(50) | 85.6(2)    |
| O(18)-Mo(2)-O(29) | 159.9(2)   | O(68)-Mo(14)-O(35)   | 103.3(2)   | O(143)-Mo(28)-O(20)  | 172.8(3) | O(26)-Co(2)-O(50) | 171.7(2)   |
| O(22)-Mo(2)-Mo(7) | 137.92(15) | O(68)-Mo(14)-O(41)   | 100.9(2)   | O(143)-Mo(28)-O(57)  | 95.7(3)  | O(41)-Co(2)-O(26) | 71.4(2)    |
| O(22)-Mo(2)-O(13) | 76.2(2)    | O(68)-Mo(14)-O(82)   | 102.5(3)   | O(143)-Mo(28)-O(98)  | 99.1(3)  | O(41)-Co(2)-O(50) | 114.2(2)   |
| O(22)-Mo(2)-O(18) | 90.9(2)    | O(82)-Mo(14)-O(9)    | 75.2(2)    | O(143)-Mo(28)-O(102) | 100.5(3) | O(80)-Co(2)-O(15) | 158.2(2)   |

|                   |            |                      |           |                      |          |                     |            |
|-------------------|------------|----------------------|-----------|----------------------|----------|---------------------|------------|
| O(22)-Mo(2)-O(24) | 155.4(2)   | O(82)-Mo(14)-O(15)   | 158.3(2)  | O(143)-Mo(28)-O(178) | 92.6(3)  | O(80)-Co(2)-O(24)   | 97.5(2)    |
| O(22)-Mo(2)-O(29) | 78.7(2)    | O(82)-Mo(14)-O(41)   | 93.8(2)   | O(178)-Mo(28)-O(20)  | 82.6(2)  | O(80)-Co(2)-O(26)   | 95.0(2)    |
| O(24)-Mo(2)-Mo(7) | 48.59(14)  | O(40)-Mo(15)-O(4)    | 80.9(2)   | O(178)-Mo(28)-O(57)  | 83.2(2)  | O(80)-Co(2)-O(41)   | 90.1(2)    |
| O(24)-Mo(2)-O(13) | 80.96(19)  | O(64)-Mo(15)-O(4)    | 85.7(2)   | O(103)-Mo(29)-O(101) | 84.5(2)  | O(80)-Co(2)-O(50)   | 91.2(2)    |
| O(24)-Mo(2)-O(29) | 87.3(2)    | O(64)-Mo(15)-O(40)   | 94.7(2)   | O(103)-Mo(29)-O(126) | 89.1(2)  | O(16)-Co(3)-O(61)   | 168.3(2)   |
| O(29)-Mo(2)-Mo(7) | 135.21(14) | O(64)-Mo(15)-O(167)  | 95.1(2)   | O(103)-Mo(29)-O(137) | 156.5(3) | O(16)-Co(3)-O(78)   | 90.00(19)  |
| O(29)-Mo(2)-O(13) | 76.09(19)  | O(64)-Mo(15)-O(175)  | 167.1(2)  | O(126)-Mo(29)-O(101) | 78.8(2)  | O(18)-Co(3)-O(16)   | 100.72(19) |
| O(77)-Mo(2)-Mo(7) | 99.19(18)  | O(117)-Mo(15)-O(4)   | 171.1(2)  | O(137)-Mo(29)-O(101) | 72.3(2)  | O(18)-Co(3)-O(61)   | 90.9(2)    |
| O(77)-Mo(2)-O(13) | 171.7(2)   | O(117)-Mo(15)-O(40)  | 91.8(2)   | O(137)-Mo(29)-O(126) | 83.0(3)  | O(18)-Co(3)-O(78)   | 169.0(2)   |
| O(77)-Mo(2)-O(18) | 103.1(2)   | O(117)-Mo(15)-O(64)  | 100.1(3)  | O(150)-Mo(29)-O(101) | 170.5(3) | O(18)-Co(3)-O(160)  | 93.0(3)    |
| O(77)-Mo(2)-O(22) | 100.9(2)   | O(117)-Mo(15)-O(167) | 100.4(3)  | O(150)-Mo(29)-O(103) | 101.0(3) | O(61)-Co(3)-O(78)   | 78.3(2)    |
| O(77)-Mo(2)-O(24) | 100.6(2)   | O(117)-Mo(15)-O(175) | 92.0(2)   | O(150)-Mo(29)-O(126) | 93.4(3)  | O(121)-Co(3)-O(16)  | 88.5(2)    |
| O(77)-Mo(2)-O(29) | 95.8(2)    | O(167)-Mo(15)-O(4)   | 85.7(2)   | O(150)-Mo(29)-O(137) | 101.6(3) | O(121)-Co(3)-O(18)  | 88.3(2)    |
| O(6)-Mo(3)-Mo(1)  | 49.14(14)  | O(167)-Mo(15)-O(40)  | 162.7(2)  | O(150)-Mo(29)-O(163) | 99.7(3)  | O(121)-Co(3)-O(61)  | 89.9(2)    |
| O(6)-Mo(3)-O(25)  | 81.8(2)    | O(167)-Mo(15)-O(175) | 87.1(2)   | O(163)-Mo(29)-O(101) | 87.8(2)  | O(121)-Co(3)-O(78)  | 89.5(2)    |
| O(6)-Mo(3)-O(43)  | 162.3(2)   | O(175)-Mo(15)-O(4)   | 81.7(2)   | O(163)-Mo(29)-O(103) | 91.5(3)  | O(121)-Co(3)-O(160) | 178.5(3)   |
| O(6)-Mo(3)-O(54)  | 87.6(2)    | O(175)-Mo(15)-O(40)  | 80.2(2)   | O(163)-Mo(29)-O(126) | 166.5(3) | O(160)-Co(3)-O(16)  | 92.1(3)    |
| O(16)-Mo(3)-Mo(1) | 47.79(14)  | O(30)-Mo(16)-Mo(13)  | 49.29(15) | O(163)-Mo(29)-O(137) | 91.1(3)  | O(160)-Co(3)-O(61)  | 89.3(3)    |
| O(16)-Mo(3)-O(6)  | 95.8(2)    | O(30)-Mo(16)-O(81)   | 148.3(2)  | O(92)-Mo(30)-O(39)   | 85.8(2)  | O(160)-Co(3)-O(78)  | 89.2(3)    |
| O(16)-Mo(3)-O(25) | 84.7(2)    | O(30)-Mo(16)-O(85)   | 85.7(2)   | O(92)-Mo(30)-O(93)   | 95.2(2)  | O(21)-Co(4)-O(30)   | 85.6(2)    |
| O(16)-Mo(3)-O(43) | 88.8(2)    | O(30)-Mo(16)-O(170)  | 69.7(2)   | O(92)-Mo(30)-O(149)  | 166.7(3) | O(21)-Co(4)-O(37)   | 89.2(2)    |
| O(16)-Mo(3)-O(54) | 164.5(2)   | O(50)-Mo(16)-Mo(13)  | 49.15(15) | O(93)-Mo(30)-O(39)   | 80.2(2)  | O(21)-Co(4)-O(111)  | 160.4(2)   |
| O(25)-Mo(3)-Mo(1) | 88.52(13)  | O(50)-Mo(16)-O(30)   | 98.4(2)   | O(103)-Mo(30)-O(39)  | 85.6(3)  | O(37)-Co(4)-O(30)   | 172.6(2)   |
| O(43)-Mo(3)-Mo(1) | 136.34(15) | O(50)-Mo(16)-O(81)   | 86.8(2)   | O(103)-Mo(30)-O(92)  | 93.3(3)  | O(62)-Co(4)-O(21)   | 103.1(2)   |
| O(43)-Mo(3)-O(25) | 81.6(2)    | O(50)-Mo(16)-O(85)   | 154.0(2)  | O(103)-Mo(30)-O(93)  | 162.9(3) | O(62)-Co(4)-O(30)   | 83.5(2)    |
| O(43)-Mo(3)-O(54) | 83.7(2)    | O(50)-Mo(16)-O(170)  | 69.4(2)   | O(103)-Mo(30)-O(149) | 88.4(2)  | O(62)-Co(4)-O(37)   | 92.6(2)    |

|                    |            |                      |            |                      |          |                       |          |
|--------------------|------------|----------------------|------------|----------------------|----------|-----------------------|----------|
| O(54)-Mo(3)-Mo(1)  | 136.55(15) | O(81)-Mo(16)-Mo(13)  | 128.75(16) | O(146)-Mo(30)-O(39)  | 172.0(3) | O(62)-Co(4)-O(111)    | 74.2(2)  |
| O(54)-Mo(3)-O(25)  | 80.8(2)    | O(81)-Mo(16)-O(170)  | 83.3(2)    | O(146)-Mo(30)-O(92)  | 99.0(3)  | O(63)-Co(4)-O(21)     | 96.8(2)  |
| O(114)-Mo(3)-Mo(1) | 98.11(19)  | O(85)-Mo(16)-Mo(13)  | 130.35(16) | O(146)-Mo(30)-O(93)  | 92.9(3)  | O(63)-Co(4)-O(30)     | 91.3(2)  |
| O(114)-Mo(3)-O(6)  | 100.5(2)   | O(85)-Mo(16)-O(81)   | 77.0(2)    | O(146)-Mo(30)-O(103) | 100.4(3) | O(63)-Co(4)-O(37)     | 94.6(2)  |
| O(114)-Mo(3)-O(16) | 101.7(2)   | O(85)-Mo(16)-O(170)  | 88.4(2)    | O(146)-Mo(30)-O(149) | 93.7(3)  | O(63)-Co(4)-O(62)     | 158.9(2) |
| O(114)-Mo(3)-O(25) | 172.9(2)   | O(138)-Mo(16)-Mo(13) | 108.0(2)   | O(149)-Mo(30)-O(39)  | 81.1(2)  | O(63)-Co(4)-O(111)    | 89.3(2)  |
| O(114)-Mo(3)-O(43) | 95.2(2)    | O(138)-Mo(16)-O(30)  | 103.9(3)   | O(149)-Mo(30)-O(93)  | 80.1(2)  | O(111)-Co(4)-O(30)    | 112.9(2) |
| O(114)-Mo(3)-O(54) | 92.5(2)    | O(138)-Mo(16)-O(50)  | 102.1(3)   | O(97)-Mo(31)-O(59)   | 77.7(2)  | O(111)-Co(4)-O(37)    | 71.7(2)  |
| O(10)-Mo(4)-O(2)   | 78.50(19)  | O(138)-Mo(16)-O(81)  | 105.5(3)   | O(98)-Mo(31)-O(59)   | 85.7(2)  | O(36)-Co(5)-O(61)#1   | 169.7(2) |
| O(28)-Mo(4)-O(2)   | 84.5(2)    | O(138)-Mo(16)-O(85)  | 101.8(3)   | O(98)-Mo(31)-O(97)   | 92.6(2)  | O(36)-Co(5)-O(69)     | 97.7(2)  |
| O(28)-Mo(4)-O(10)  | 162.1(2)   | O(138)-Mo(16)-O(170) | 167.7(2)   | O(98)-Mo(31)-O(135)  | 93.2(3)  | O(36)-Co(5)-O(78)#1   | 91.9(2)  |
| O(28)-Mo(4)-O(35)  | 88.8(2)    | O(170)-Mo(16)-Mo(13) | 59.85(13)  | O(98)-Mo(31)-O(136)  | 167.1(3) | O(36)-Co(5)-O(132)    | 92.5(2)  |
| O(28)-Mo(4)-O(38)  | 91.3(2)    | O(5)-Mo(17)-O(48)    | 85.40(19)  | O(135)-Mo(31)-O(59)  | 84.9(2)  | O(61)#1-Co(5)-O(78)#1 | 77.9(2)  |
| O(35)-Mo(4)-O(2)   | 83.7(2)    | O(19)-Mo(17)-O(5)    | 76.7(2)    | O(135)-Mo(31)-O(97)  | 161.2(3) | O(69)-Co(5)-O(61)#1   | 92.4(2)  |
| O(35)-Mo(4)-O(10)  | 83.9(2)    | O(19)-Mo(17)-O(48)   | 72.5(2)    | O(135)-Mo(31)-O(136) | 87.7(3)  | O(69)-Co(5)-O(78)#1   | 170.1(2) |
| O(38)-Mo(4)-O(2)   | 84.3(2)    | O(70)-Mo(17)-O(5)    | 159.6(2)   | O(136)-Mo(31)-O(59)  | 81.6(2)  | O(122)-Co(5)-O(36)    | 88.5(2)  |
| O(38)-Mo(4)-O(10)  | 92.4(2)    | O(70)-Mo(17)-O(19)   | 91.3(2)    | O(136)-Mo(31)-O(97)  | 82.8(2)  | O(122)-Co(5)-O(61)#1  | 89.6(2)  |
| O(38)-Mo(4)-O(35)  | 167.9(2)   | O(70)-Mo(17)-O(48)   | 75.2(2)    | O(155)-Mo(31)-O(59)  | 170.9(3) | O(122)-Co(5)-O(69)    | 88.3(2)  |
| O(74)-Mo(4)-O(2)   | 174.1(2)   | O(118)-Mo(17)-O(5)   | 97.0(2)    | O(155)-Mo(31)-O(97)  | 94.5(3)  | O(122)-Co(5)-O(78)#1  | 89.5(2)  |
| O(74)-Mo(4)-O(10)  | 95.6(2)    | O(118)-Mo(17)-O(19)  | 99.7(2)    | O(155)-Mo(31)-O(98)  | 99.6(3)  | O(122)-Co(5)-O(132)   | 178.8(3) |
| O(74)-Mo(4)-O(28)  | 101.4(2)   | O(118)-Mo(17)-O(48)  | 171.1(2)   | O(155)-Mo(31)-O(135) | 102.1(3) | O(132)-Co(5)-O(61)#1  | 89.3(2)  |
| O(74)-Mo(4)-O(35)  | 95.4(2)    | O(118)-Mo(17)-O(70)  | 101.3(3)   | O(155)-Mo(31)-O(136) | 92.7(3)  | O(132)-Co(5)-O(69)    | 92.2(3)  |
| O(74)-Mo(4)-O(38)  | 96.4(2)    | O(118)-Mo(17)-O(175) | 104.2(3)   | O(105)-Mo(32)-O(60)  | 79.7(2)  | O(132)-Co(5)-O(78)#1  | 89.8(2)  |
| O(21)-Mo(5)-Mo(6)  | 49.06(15)  | O(175)-Mo(17)-O(5)   | 85.2(2)    | O(112)-Mo(32)-O(60)  | 72.4(2)  | O(86)-Co(6)-O(110)    | 74.4(3)  |
| O(21)-Mo(5)-O(56)  | 86.9(2)    | O(175)-Mo(17)-O(19)  | 151.6(2)   | O(112)-Mo(32)-O(105) | 82.4(2)  | O(86)-Co(6)-O(125)    | 82.3(2)  |
| O(21)-Mo(5)-O(58)  | 82.4(2)    | O(175)-Mo(17)-O(48)  | 84.5(2)    | O(134)-Mo(32)-O(60)  | 169.4(3) | O(86)-Co(6)-O(180)    | 94.0(2)  |

|                      |            |                      |           |                      |          |                     |          |
|----------------------|------------|----------------------|-----------|----------------------|----------|---------------------|----------|
| O(21)-Mo(5)-O(72)#1  | 161.1(2)   | O(175)-Mo(17)-O(70)  | 98.8(2)   | O(134)-Mo(32)-O(105) | 92.6(3)  | O(96)-Co(6)-O(86)   | 103.8(2) |
| O(36)-Mo(5)-Mo(6)    | 48.27(16)  | O(75)-Mo(18)-O(9)    | 71.50(19) | O(134)-Mo(32)-O(112) | 99.6(3)  | O(96)-Co(6)-O(110)  | 161.0(2) |
| O(36)-Mo(5)-O(21)    | 96.2(2)    | O(82)-Mo(18)-O(9)    | 72.48(19) | O(134)-Mo(32)-O(163) | 99.4(3)  | O(96)-Co(6)-O(125)  | 86.1(2)  |
| O(36)-Mo(5)-O(56)    | 165.6(2)   | O(82)-Mo(18)-O(75)   | 80.7(2)   | O(134)-Mo(32)-O(174) | 102.1(3) | O(96)-Co(6)-O(180)  | 89.2(2)  |
| O(36)-Mo(5)-O(58)    | 85.8(2)    | O(94)-Mo(18)-O(9)    | 86.4(2)   | O(163)-Mo(32)-O(60)  | 87.9(2)  | O(110)-Co(6)-O(125) | 112.1(2) |
| O(36)-Mo(5)-O(72)#1  | 88.4(2)    | O(94)-Mo(18)-O(75)   | 157.7(2)  | O(163)-Mo(32)-O(105) | 167.5(3) | O(110)-Co(6)-O(180) | 72.2(2)  |
| O(56)-Mo(5)-Mo(6)    | 135.92(14) | O(94)-Mo(18)-O(82)   | 89.8(2)   | O(163)-Mo(32)-O(112) | 92.0(3)  | O(127)-Co(6)-O(86)  | 157.2(2) |
| O(56)-Mo(5)-O(58)    | 80.65(19)  | O(94)-Mo(18)-O(104)  | 94.0(2)   | O(163)-Mo(32)-O(174) | 91.3(3)  | O(127)-Co(6)-O(96)  | 97.4(2)  |
| O(58)-Mo(5)-Mo(6)    | 89.58(13)  | O(104)-Mo(18)-O(9)   | 85.6(2)   | O(174)-Mo(32)-O(60)  | 85.2(2)  | O(127)-Co(6)-O(110) | 88.2(2)  |
| O(72)#1-Mo(5)-Mo(6)  | 136.21(15) | O(104)-Mo(18)-O(75)  | 87.7(2)   | O(174)-Mo(32)-O(105) | 89.7(2)  | O(127)-Co(6)-O(125) | 91.0(3)  |
| O(72)#1-Mo(5)-O(56)  | 84.3(2)    | O(104)-Mo(18)-O(82)  | 157.5(2)  | O(174)-Mo(32)-O(112) | 157.2(2) | O(127)-Co(6)-O(180) | 94.6(3)  |
| O(72)#1-Mo(5)-O(58)  | 79.7(2)    | O(130)-Mo(18)-O(9)   | 166.3(2)  | O(99)-Mo(33)-O(83)   | 71.8(2)  | O(180)-Co(6)-O(125) | 173.1(2) |
| O(120)-Mo(5)-Mo(6)   | 98.80(18)  | O(130)-Mo(18)-O(75)  | 98.5(3)   | O(99)-Mo(33)-O(123)  | 79.2(2)  | O(8)-P(1)-O(11)     | 108.9(3) |
| O(120)-Mo(5)-O(21)   | 101.2(3)   | O(130)-Mo(18)-O(82)  | 97.0(3)   | O(105)-Mo(33)-O(83)  | 86.3(2)  | O(8)-P(1)-O(17)     | 110.8(3) |
| O(120)-Mo(5)-O(36)   | 101.6(2)   | O(130)-Mo(18)-O(94)  | 102.7(3)  | O(105)-Mo(33)-O(99)  | 89.7(3)  | O(8)-P(1)-O(52)     | 109.2(3) |
| O(120)-Mo(5)-O(56)   | 91.5(2)    | O(130)-Mo(18)-O(104) | 103.7(3)  | O(105)-Mo(33)-O(123) | 157.7(3) | O(17)-P(1)-O(11)    | 111.1(3) |
| O(120)-Mo(5)-O(58)   | 171.3(2)   | O(28)-Mo(19)-O(12)   | 87.1(2)   | O(105)-Mo(33)-O(176) | 95.3(3)  | O(17)-P(1)-O(52)    | 106.5(3) |
| O(120)-Mo(5)-O(72)#1 | 95.8(2)    | O(28)-Mo(19)-O(51)   | 92.3(2)   | O(123)-Mo(33)-O(83)  | 71.9(2)  | O(52)-P(1)-O(11)    | 110.2(3) |
| O(21)-Mo(6)-Mo(5)    | 48.63(16)  | O(28)-Mo(19)-O(53)   | 159.1(2)  | O(171)-Mo(33)-O(83)  | 165.4(3) | O(1)-P(2)-O(9)      | 109.9(3) |
| O(21)-Mo(6)-O(32)    | 81.0(2)    | O(28)-Mo(19)-O(94)   | 90.5(2)   | O(171)-Mo(33)-O(99)  | 97.3(3)  | O(1)-P(2)-O(12)     | 111.3(3) |
| O(21)-Mo(6)-O(49)    | 87.9(2)    | O(51)-Mo(19)-O(12)   | 85.5(2)   | O(171)-Mo(33)-O(105) | 103.7(3) | O(2)-P(2)-O(1)      | 109.2(3) |
| O(32)-Mo(6)-Mo(5)    | 87.65(13)  | O(51)-Mo(19)-O(53)   | 89.1(2)   | O(171)-Mo(33)-O(123) | 96.9(3)  | O(2)-P(2)-O(9)      | 108.8(3) |
| O(34)-Mo(6)-Mo(5)    | 137.51(17) | O(51)-Mo(19)-O(94)   | 164.7(2)  | O(171)-Mo(33)-O(176) | 103.3(3) | O(2)-P(2)-O(12)     | 110.5(3) |
| O(34)-Mo(6)-O(21)    | 155.7(2)   | O(53)-Mo(19)-O(12)   | 72.2(2)   | O(176)-Mo(33)-O(83)  | 86.0(2)  | O(12)-P(2)-O(9)     | 107.1(3) |
| O(34)-Mo(6)-O(32)    | 76.3(2)    | O(94)-Mo(19)-O(12)   | 79.6(2)   | O(176)-Mo(33)-O(99)  | 157.0(2) | O(10)-P(3)-O(15)    | 111.5(3) |
| O(34)-Mo(6)-O(36)    | 90.6(2)    | O(94)-Mo(19)-O(53)   | 83.0(2)   | O(176)-Mo(33)-O(123) | 88.1(3)  | O(10)-P(3)-O(29)    | 109.8(3) |

|                    |            |                      |          |                        |            |                  |          |
|--------------------|------------|----------------------|----------|------------------------|------------|------------------|----------|
| O(34)-Mo(6)-O(49)  | 78.4(2)    | O(109)-Mo(19)-O(12)  | 168.5(2) | O(69)-Mo(34)-Mo(25)    | 48.63(16)  | O(10)-P(3)-O(65) | 108.1(3) |
| O(36)-Mo(6)-Mo(5)  | 48.42(15)  | O(109)-Mo(19)-O(28)  | 103.2(2) | O(69)-Mo(34)-O(96)     | 96.3(2)    | O(29)-P(3)-O(15) | 108.9(3) |
| O(36)-Mo(6)-O(21)  | 95.9(2)    | O(109)-Mo(19)-O(51)  | 99.0(3)  | O(69)-Mo(34)-O(119)    | 85.2(2)    | O(29)-P(3)-O(65) | 109.0(3) |
| O(36)-Mo(6)-O(32)  | 84.6(2)    | O(109)-Mo(19)-O(53)  | 97.2(3)  | O(69)-Mo(34)-O(153)#1  | 87.7(2)    | O(65)-P(3)-O(15) | 109.6(3) |
| O(36)-Mo(6)-O(49)  | 159.7(2)   | O(109)-Mo(19)-O(94)  | 95.1(3)  | O(69)-Mo(34)-O(164)    | 165.7(3)   | O(3)-P(4)-O(4)   | 108.7(3) |
| O(49)-Mo(6)-Mo(5)  | 135.78(15) | O(42)-Mo(20)-O(23)   | 80.6(2)  | O(96)-Mo(34)-Mo(25)    | 48.86(17)  | O(3)-P(4)-O(31)  | 110.2(3) |
| O(49)-Mo(6)-O(32)  | 76.2(2)    | O(92)-Mo(20)-O(23)   | 85.5(2)  | O(96)-Mo(34)-O(119)    | 82.7(2)    | O(3)-P(4)-O(48)  | 110.0(3) |
| O(89)-Mo(6)-Mo(5)  | 98.87(19)  | O(92)-Mo(20)-O(42)   | 94.6(2)  | O(96)-Mo(34)-O(153)#1  | 161.4(3)   | O(4)-P(4)-O(31)  | 111.7(3) |
| O(89)-Mo(6)-O(21)  | 99.3(2)    | O(92)-Mo(20)-O(106)  | 167.4(2) | O(96)-Mo(34)-O(164)    | 86.3(2)    | O(4)-P(4)-O(48)  | 109.3(3) |
| O(89)-Mo(6)-O(32)  | 171.6(2)   | O(92)-Mo(20)-O(174)  | 93.3(2)  | O(119)-Mo(34)-Mo(25)   | 89.68(16)  | O(31)-P(4)-O(48) | 106.8(3) |
| O(89)-Mo(6)-O(34)  | 101.9(2)   | O(106)-Mo(20)-O(23)  | 82.1(2)  | O(144)-Mo(34)-Mo(25)   | 98.2(2)    | O(13)-P(5)-O(26) | 108.8(3) |
| O(89)-Mo(6)-O(36)  | 103.6(3)   | O(106)-Mo(20)-O(42)  | 81.0(2)  | O(144)-Mo(34)-O(69)    | 101.3(3)   | O(13)-P(5)-O(27) | 109.0(3) |
| O(89)-Mo(6)-O(49)  | 95.4(2)    | O(173)-Mo(20)-O(23)  | 171.2(2) | O(144)-Mo(34)-O(96)    | 101.1(3)   | O(13)-P(5)-O(44) | 109.5(3) |
| O(18)-Mo(7)-Mo(2)  | 47.81(15)  | O(173)-Mo(20)-O(42)  | 91.9(2)  | O(144)-Mo(34)-O(119)   | 172.0(3)   | O(27)-P(5)-O(26) | 110.7(3) |
| O(18)-Mo(7)-O(24)  | 95.5(2)    | O(173)-Mo(20)-O(92)  | 99.9(3)  | O(144)-Mo(34)-O(153)#1 | 95.9(3)    | O(44)-P(5)-O(26) | 109.1(3) |
| O(18)-Mo(7)-O(44)  | 84.7(2)    | O(173)-Mo(20)-O(106) | 92.2(3)  | O(144)-Mo(34)-O(164)   | 92.0(3)    | O(44)-P(5)-O(27) | 109.8(3) |
| O(18)-Mo(7)-O(71)  | 165.5(2)   | O(173)-Mo(20)-O(174) | 101.1(3) | O(153)#1-Mo(34)-Mo(25) | 135.89(17) | O(32)-P(6)-O(37) | 108.8(3) |
| O(18)-Mo(7)-O(162) | 89.4(2)    | O(174)-Mo(20)-O(23)  | 85.4(2)  | O(153)#1-Mo(34)-O(119) | 79.5(2)    | O(32)-P(6)-O(42) | 110.0(3) |
| O(24)-Mo(7)-Mo(2)  | 48.88(15)  | O(174)-Mo(20)-O(42)  | 163.3(2) | O(153)#1-Mo(34)-O(164) | 85.7(2)    | O(42)-P(6)-O(37) | 110.4(3) |
| O(24)-Mo(7)-O(44)  | 81.8(2)    | O(174)-Mo(20)-O(106) | 88.1(2)  | O(164)-Mo(34)-Mo(25)   | 135.06(18) | O(58)-P(6)-O(32) | 109.4(3) |
| O(24)-Mo(7)-O(71)  | 87.3(2)    | O(33)-Mo(21)-O(12)   | 86.8(2)  | O(164)-Mo(34)-O(119)   | 81.1(2)    | O(58)-P(6)-O(37) | 108.8(3) |
| O(24)-Mo(7)-O(162) | 162.8(2)   | O(33)-Mo(21)-O(53)   | 159.1(2) | O(135)-Mo(35)-O(101)   | 86.0(2)    | O(58)-P(6)-O(42) | 109.4(3) |
| O(44)-Mo(7)-Mo(2)  | 88.57(13)  | O(33)-Mo(21)-O(104)  | 90.5(2)  | O(135)-Mo(35)-O(137)   | 157.5(3)   | O(56)-P(7)-O(84) | 110.7(3) |
| O(71)-Mo(7)-Mo(2)  | 136.16(15) | O(33)-Mo(21)-O(161)  | 91.7(2)  | O(135)-Mo(35)-O(166)   | 87.9(3)    | O(56)-P(7)-O(91) | 103.4(3) |
| O(71)-Mo(7)-O(44)  | 81.6(2)    | O(53)-Mo(21)-O(12)   | 72.4(2)  | O(137)-Mo(35)-O(101)   | 72.0(2)    | O(63)-P(7)-O(56) | 113.9(3) |
| O(95)-Mo(7)-Mo(2)  | 97.68(18)  | O(104)-Mo(21)-O(12)  | 80.0(2)  | O(137)-Mo(35)-O(166)   | 83.5(3)    | O(63)-P(7)-O(84) | 111.7(3) |

|                    |            |                      |           |                      |          |                   |          |
|--------------------|------------|----------------------|-----------|----------------------|----------|-------------------|----------|
| O(95)-Mo(7)-O(18)  | 100.9(2)   | O(104)-Mo(21)-O(53)  | 84.4(2)   | O(147)-Mo(35)-O(101) | 87.5(2)  | O(63)-P(7)-O(91)  | 109.2(3) |
| O(95)-Mo(7)-O(24)  | 100.8(2)   | O(129)-Mo(21)-O(12)  | 168.8(3)  | O(147)-Mo(35)-O(135) | 92.4(3)  | O(84)-P(7)-O(91)  | 107.4(3) |
| O(95)-Mo(7)-O(44)  | 173.4(2)   | O(129)-Mo(21)-O(33)  | 102.2(3)  | O(147)-Mo(35)-O(137) | 91.3(3)  | O(43)-P(8)-O(140) | 105.6(3) |
| O(95)-Mo(7)-O(71)  | 92.5(2)    | O(129)-Mo(21)-O(53)  | 98.3(3)   | O(147)-Mo(35)-O(166) | 166.4(2) | O(72)-P(8)-O(43)  | 110.5(3) |
| O(95)-Mo(7)-O(162) | 94.4(2)    | O(129)-Mo(21)-O(104) | 93.1(3)   | O(151)-Mo(35)-O(101) | 168.8(3) | O(72)-P(8)-O(78)  | 112.9(3) |
| O(162)-Mo(7)-Mo(2) | 136.98(16) | O(129)-Mo(21)-O(161) | 99.7(3)   | O(151)-Mo(35)-O(135) | 102.0(3) | O(72)-P(8)-O(140) | 106.3(3) |
| O(162)-Mo(7)-O(44) | 82.2(2)    | O(161)-Mo(21)-O(12)  | 86.4(2)   | O(151)-Mo(35)-O(137) | 99.2(3)  | O(78)-P(8)-O(43)  | 112.8(3) |
| O(162)-Mo(7)-O(71) | 84.0(2)    | O(161)-Mo(21)-O(53)  | 88.7(2)   | O(151)-Mo(35)-O(147) | 99.9(3)  | O(78)-P(8)-O(140) | 108.2(3) |
| O(17)-Mo(8)-O(3)   | 77.50(19)  | O(161)-Mo(21)-O(104) | 166.2(2)  | O(151)-Mo(35)-O(166) | 93.4(3)  | O(14)-P(9)-O(5)   | 109.3(3) |
| O(17)-Mo(8)-O(45)  | 82.8(2)    | O(51)-Mo(22)-O(31)   | 86.6(2)   | O(166)-Mo(35)-O(101) | 79.0(2)  | O(14)-P(9)-O(25)  | 109.8(3) |
| O(38)-Mo(8)-O(3)   | 86.5(2)    | O(51)-Mo(22)-O(66)   | 90.4(2)   | O(102)-Mo(36)-O(60)  | 85.5(2)  | O(14)-P(9)-O(40)  | 109.3(3) |
| O(38)-Mo(8)-O(17)  | 92.6(2)    | O(51)-Mo(22)-O(73)   | 165.7(2)  | O(102)-Mo(36)-O(112) | 157.1(2) | O(25)-P(9)-O(5)   | 108.7(3) |
| O(38)-Mo(8)-O(45)  | 168.3(2)   | O(51)-Mo(22)-O(88)   | 92.4(2)   | O(102)-Mo(36)-O(176) | 88.9(3)  | O(25)-P(9)-O(40)  | 109.9(3) |
| O(38)-Mo(8)-O(66)  | 94.6(2)    | O(66)-Mo(22)-O(31)   | 86.0(2)   | O(112)-Mo(36)-O(60)  | 71.9(2)  | O(40)-P(9)-O(5)   | 109.8(3) |
| O(45)-Mo(8)-O(3)   | 82.0(2)    | O(66)-Mo(22)-O(73)   | 88.1(2)   | O(112)-Mo(36)-O(176) | 83.3(3)  | O(46)-P(10)-O(54) | 113.9(3) |
| O(66)-Mo(8)-O(3)   | 85.0(2)    | O(66)-Mo(22)-O(88)   | 157.6(2)  | O(145)-Mo(36)-O(60)  | 169.8(3) | O(46)-P(10)-O(67) | 112.1(3) |
| O(66)-Mo(8)-O(17)  | 160.6(2)   | O(73)-Mo(22)-O(31)   | 79.1(2)   | O(145)-Mo(36)-O(102) | 102.4(3) | O(46)-P(10)-O(79) | 105.1(3) |
| O(66)-Mo(8)-O(45)  | 86.5(2)    | O(88)-Mo(22)-O(31)   | 72.1(2)   | O(145)-Mo(36)-O(112) | 99.6(3)  | O(54)-P(10)-O(67) | 110.7(3) |
| O(108)-Mo(8)-O(3)  | 170.6(2)   | O(88)-Mo(22)-O(73)   | 83.8(2)   | O(145)-Mo(36)-O(147) | 100.4(3) | O(54)-P(10)-O(79) | 107.6(3) |
| O(108)-Mo(8)-O(17) | 95.6(2)    | O(172)-Mo(22)-O(31)  | 169.0(2)  | O(145)-Mo(36)-O(176) | 93.7(3)  | O(67)-P(10)-O(79) | 107.0(3) |
| O(108)-Mo(8)-O(38) | 100.2(2)   | O(172)-Mo(22)-O(51)  | 101.5(3)  | O(147)-Mo(36)-O(60)  | 85.6(2)  | O(20)-P(11)-O(23) | 108.7(3) |
| O(108)-Mo(8)-O(45) | 90.9(2)    | O(172)-Mo(22)-O(66)  | 101.3(3)  | O(147)-Mo(36)-O(102) | 91.6(3)  | O(20)-P(11)-O(60) | 110.6(3) |
| O(108)-Mo(8)-O(66) | 100.7(2)   | O(172)-Mo(22)-O(73)  | 92.8(3)   | O(147)-Mo(36)-O(112) | 90.8(3)  | O(20)-P(11)-O(83) | 109.0(3) |
| O(11)-Mo(9)-O(48)  | 82.28(18)  | O(172)-Mo(22)-O(88)  | 99.9(3)   | O(147)-Mo(36)-O(176) | 165.5(3) | O(23)-P(11)-O(60) | 111.3(3) |
| O(19)-Mo(9)-O(11)  | 76.5(2)    | O(55)-Mo(23)-O(48)   | 72.13(19) | O(176)-Mo(36)-O(60)  | 79.9(2)  | O(23)-P(11)-O(83) | 109.9(3) |
| O(19)-Mo(9)-O(48)  | 72.9(2)    | O(70)-Mo(23)-O(48)   | 71.83(19) | O(86)-Mo(37)-O(90)   | 83.6(2)  | O(60)-P(11)-O(83) | 107.1(3) |

|                     |           |                      |           |                          |           |                     |          |
|---------------------|-----------|----------------------|-----------|--------------------------|-----------|---------------------|----------|
| O(45)-Mo(9)-O(11)   | 83.9(2)   | O(70)-Mo(23)-O(55)   | 79.7(2)   | O(110)-Mo(37)-O(86)      | 75.9(2)   | O(49)-P(12)-O(57)   | 110.2(3) |
| O(45)-Mo(9)-O(19)   | 151.9(2)  | O(73)-Mo(23)-O(48)   | 85.6(2)   | O(110)-Mo(37)-O(90)      | 72.0(2)   | O(49)-P(12)-O(62)   | 108.6(3) |
| O(45)-Mo(9)-O(48)   | 84.8(2)   | O(73)-Mo(23)-O(55)   | 88.5(2)   | O(136)-Mo(37)-O(86)      | 82.8(3)   | O(49)-P(12)-O(85)   | 108.9(3) |
| O(45)-Mo(9)-O(55)   | 98.9(2)   | O(73)-Mo(23)-O(70)   | 156.8(2)  | O(136)-Mo(37)-O(90)      | 84.2(2)   | O(57)-P(12)-O(62)   | 111.6(3) |
| O(55)-Mo(9)-O(11)   | 157.4(2)  | O(73)-Mo(23)-O(87)   | 95.4(2)   | O(136)-Mo(37)-O(110)     | 149.4(3)  | O(57)-P(12)-O(85)   | 107.1(3) |
| O(55)-Mo(9)-O(19)   | 92.0(2)   | O(87)-Mo(23)-O(48)   | 85.3(2)   | O(136)-Mo(37)-O(139)     | 100.1(3)  | O(85)-P(12)-O(62)   | 110.3(3) |
| O(55)-Mo(9)-O(48)   | 75.7(2)   | O(87)-Mo(23)-O(55)   | 156.8(2)  | O(139)-Mo(37)-O(86)      | 158.0(3)  | O(71)-P(13)-O(81)   | 110.6(3) |
| O(113)-Mo(9)-O(11)  | 98.4(2)   | O(87)-Mo(23)-O(70)   | 88.2(2)   | O(139)-Mo(37)-O(90)      | 75.1(2)   | O(71)-P(13)-O(159)  | 106.3(3) |
| O(113)-Mo(9)-O(19)  | 99.6(2)   | O(107)-Mo(23)-O(48)  | 165.4(2)  | O(139)-Mo(37)-O(110)     | 92.1(3)   | O(80)-P(13)-O(71)   | 114.3(3) |
| O(113)-Mo(9)-O(45)  | 103.1(3)  | O(107)-Mo(23)-O(55)  | 97.2(3)   | O(148)-Mo(37)-O(86)      | 97.3(3)   | O(80)-P(13)-O(81)   | 111.4(3) |
| O(113)-Mo(9)-O(48)  | 172.1(2)  | O(107)-Mo(23)-O(70)  | 96.8(3)   | O(148)-Mo(37)-O(90)      | 172.5(3)  | O(80)-P(13)-O(159)  | 107.3(3) |
| O(113)-Mo(9)-O(55)  | 102.7(3)  | O(107)-Mo(23)-O(73)  | 104.5(3)  | O(148)-Mo(37)-O(110)     | 101.0(3)  | O(81)-P(13)-O(159)  | 106.3(3) |
| O(27)-Mo(10)-O(1)   | 81.70(19) | O(107)-Mo(23)-O(87)  | 103.9(3)  | O(148)-Mo(37)-O(136)     | 103.2(3)  | O(61)-P(14)-O(153)  | 112.4(3) |
| O(33)-Mo(10)-O(1)   | 84.8(2)   | O(37)-Mo(24)-O(83)   | 85.11(19) | O(148)-Mo(37)-O(139)     | 103.2(3)  | O(61)-P(14)-O(157)  | 107.8(3) |
| O(33)-Mo(10)-O(27)  | 163.7(2)  | O(99)-Mo(24)-O(37)   | 159.6(2)  | O(125)#1-Mo(38)-Mo(38)   | 48.99(17) | O(61)-P(14)-O(162)  | 113.5(3) |
| O(33)-Mo(10)-O(47)  | 88.4(2)   | O(99)-Mo(24)-O(83)   | 75.4(2)   | O(125)-Mo(38)-Mo(38)#1   | 49.0(2)   | O(153)-P(14)-O(157) | 106.2(4) |
| O(33)-Mo(10)-O(64)  | 92.8(2)   | O(99)-Mo(24)-O(111)  | 92.0(3)   | O(125)-Mo(38)-O(125)#1   | 98.0(2)   | O(153)-P(14)-O(162) | 109.8(3) |
| O(47)-Mo(10)-O(1)   | 82.6(2)   | O(106)-Mo(24)-O(37)  | 84.6(2)   | O(125)-Mo(38)-O(131)#1   | 154.4(2)  | O(162)-P(14)-O(157) | 106.7(4) |
| O(47)-Mo(10)-O(27)  | 80.9(2)   | O(106)-Mo(24)-O(83)  | 82.8(2)   | O(125)#1-Mo(38)-O(131)#1 | 86.0(3)   | O(39)-P(15)-O(59)   | 108.9(3) |
| O(64)-Mo(10)-O(1)   | 83.9(2)   | O(106)-Mo(24)-O(99)  | 98.5(3)   | O(125)-Mo(38)-O(156)     | 69.31(19) | O(39)-P(15)-O(90)   | 109.9(3) |
| O(64)-Mo(10)-O(27)  | 94.8(2)   | O(106)-Mo(24)-O(111) | 149.8(2)  | O(125)#1-Mo(38)-O(156)   | 69.30(18) | O(39)-P(15)-O(101)  | 110.8(3) |
| O(64)-Mo(10)-O(47)  | 166.2(2)  | O(111)-Mo(24)-O(37)  | 76.3(2)   | O(125)#1-Mo(38)-O(165)   | 147.7(2)  | O(59)-P(15)-O(90)   | 109.2(3) |
| O(115)-Mo(10)-O(1)  | 174.2(2)  | O(111)-Mo(24)-O(83)  | 72.5(2)   | O(125)-Mo(38)-O(165)     | 87.7(3)   | O(101)-P(15)-O(59)  | 111.1(4) |
| O(115)-Mo(10)-O(27) | 92.6(2)   | O(152)-Mo(24)-O(37)  | 97.3(2)   | O(131)#1-Mo(38)-Mo(38)   | 130.2(2)  | O(101)-P(15)-O(90)  | 107.0(3) |
| O(115)-Mo(10)-O(33) | 100.7(3)  | O(152)-Mo(24)-O(83)  | 173.4(3)  | O(131)#1-Mo(38)-O(156)   | 88.9(2)   | O(93)-P(16)-O(180)  | 109.9(3) |
| O(115)-Mo(10)-O(47) | 95.7(3)   | O(152)-Mo(24)-O(99)  | 101.4(3)  | O(131)#1-Mo(38)-O(165)   | 76.2(3)   | O(119)-P(16)-O(93)  | 110.0(4) |



|                         |            |                      |            |                        |            |                     |          |
|-------------------------|------------|----------------------|------------|------------------------|------------|---------------------|----------|
| O(115)-Mo(10)-O(64)     | 97.5(3)    | O(152)-Mo(24)-O(106) | 103.5(3)   | O(156)-Mo(38)-Mo(38)#1 | 58.87(11)  | O(119)-P(16)-O(180) | 108.9(3) |
| O(7)-Mo(11)-Mo(11)#1    | 48.80(15)  | O(152)-Mo(24)-O(111) | 102.0(3)   | O(158)-Mo(38)-Mo(38)#1 | 108.1(2)   | O(169)-P(16)-O(93)  | 109.9(3) |
| O(7)#1-Mo(11)-Mo(11)#1  | 48.60(15)  | O(34)-Mo(25)-Mo(34)  | 137.60(17) | O(158)-Mo(38)-O(125)   | 101.4(3)   | O(169)-P(16)-O(119) | 109.4(3) |
| O(7)-Mo(11)-O(7)#1      | 97.4(2)    | O(34)-Mo(25)-O(69)   | 90.7(2)    | O(158)-Mo(38)-O(125)#1 | 104.0(3)   | O(169)-P(16)-O(180) | 108.8(4) |
| O(7)-Mo(11)-O(52)       | 86.6(2)    | O(34)-Mo(25)-O(96)   | 155.6(2)   | O(158)-Mo(38)-O(131)#1 | 102.2(3)   | O(97)-P(17)-O(86)   | 111.6(4) |
| O(7)#1-Mo(11)-O(52)     | 153.2(2)   | O(34)-Mo(25)-O(169)  | 76.7(2)    | O(158)-Mo(38)-O(156)   | 166.9(3)   | O(97)-P(17)-O(131)  | 106.7(4) |
| O(7)#1-Mo(11)-O(67)#1   | 88.1(2)    | O(34)-Mo(25)-O(179)  | 78.2(2)    | O(158)-Mo(38)-O(165)   | 106.0(3)   | O(97)-P(17)-O(179)  | 110.7(3) |
| O(7)-Mo(11)-O(67)#1     | 147.4(2)   | O(69)-Mo(25)-Mo(34)  | 48.23(17)  | O(165)-Mo(38)-Mo(38)#1 | 128.81(18) | O(131)-P(17)-O(86)  | 110.4(4) |
| O(52)-Mo(11)-Mo(11)#1   | 129.98(15) | O(69)-Mo(25)-O(96)   | 96.1(2)    | O(165)-Mo(38)-O(156)   | 83.4(2)    | O(179)-P(17)-O(86)  | 108.2(3) |
| O(52)-Mo(11)-O(67)#1    | 75.2(2)    | O(69)-Mo(25)-O(169)  | 83.7(2)    | O(116)-Mo(39)-O(90)    | 71.5(2)    | O(179)-P(17)-O(131) | 109.1(3) |
| O(67)#1-Mo(11)-Mo(11)#1 | 128.65(15) | O(69)-Mo(25)-O(179)  | 158.5(2)   | O(116)-Mo(39)-O(139)   | 77.9(3)    | O(127)-P(18)-O(142) | 108.4(4) |
| O(124)-Mo(11)-Mo(11)#1  | 108.7(2)   | O(96)-Mo(25)-Mo(34)  | 49.11(17)  | O(126)-Mo(39)-O(90)    | 86.0(2)    | O(127)-P(18)-O(164) | 113.5(4) |
| O(124)-Mo(11)-O(7)      | 104.6(2)   | O(96)-Mo(25)-O(169)  | 80.8(2)    | O(126)-Mo(39)-O(116)   | 90.5(3)    | O(127)-P(18)-O(165) | 112.2(4) |
| O(124)-Mo(11)-O(7)#1    | 101.6(2)   | O(96)-Mo(25)-O(179)  | 87.3(2)    | O(126)-Mo(39)-O(139)   | 157.1(2)   | O(164)-P(18)-O(142) | 104.8(4) |
| O(124)-Mo(11)-O(52)     | 103.0(3)   | O(133)-Mo(25)-Mo(34) | 99.3(2)    | O(139)-Mo(39)-O(90)    | 71.6(2)    | O(164)-P(18)-O(165) | 111.7(4) |
| O(124)-Mo(11)-O(67)#1   | 105.7(2)   | O(133)-Mo(25)-O(34)  | 101.3(3)   | O(166)-Mo(39)-O(90)    | 85.6(2)    | O(165)-P(18)-O(142) | 105.6(4) |

Symmetry code: #1, -x+1,y,-z+3/2

**Table S3.** The bond length (Å) range in compound **1**.

| Bond         | Length (Å) | Bond          | Length (Å) | Bond          | Length (Å) | Bond          | Length (Å) |
|--------------|------------|---------------|------------|---------------|------------|---------------|------------|
| Pb(1)-O(8)   | 2.666(5)   | Mo(13)-O(170) | 2.506(6)   | Mo(28)-O(178) | 2.019(6)   | Co(3)-O(160)  | 2.098(7)   |
| Pb(1)-O(13)  | 2.484(5)   | Mo(14)-O(9)   | 2.433(5)   | Mo(29)-O(101) | 2.277(6)   | Co(4)-O(21)   | 2.069(5)   |
| Pb(1)-O(14)  | 2.485(5)   | Mo(14)-O(15)  | 2.156(5)   | Mo(29)-O(103) | 1.894(6)   | Co(4)-O(30)   | 2.170(6)   |
| Pb(1)-O(22)  | 2.474(5)   | Mo(14)-O(35)  | 1.813(5)   | Mo(29)-O(126) | 2.066(6)   | Co(4)-O(37)   | 2.158(6)   |
| Pb(1)-O(29)  | 2.681(5)   | Mo(14)-O(41)  | 1.948(5)   | Mo(29)-O(137) | 1.954(6)   | Co(4)-O(62)   | 2.055(5)   |
| Pb(2)-O(32)  | 2.472(5)   | Mo(14)-O(68)  | 1.686(5)   | Mo(29)-O(150) | 1.678(6)   | Co(4)-O(63)   | 1.988(5)   |
| Pb(2)-O(34)  | 2.477(5)   | Mo(14)-O(82)  | 1.825(5)   | Mo(29)-O(163) | 1.872(6)   | Co(4)-O(111)  | 2.157(5)   |
| Pb(2)-O(49)  | 2.705(6)   | Mo(15)-O(4)   | 2.144(5)   | Mo(30)-O(39)  | 2.141(6)   | Co(5)-O(36)   | 2.080(6)   |
| Pb(2)-O(169) | 2.493(6)   | Mo(15)-O(40)  | 2.075(5)   | Mo(30)-O(92)  | 1.889(6)   | Co(5)-O(61)#1 | 2.150(6)   |
| Pb(2)-O(179) | 2.673(6)   | Mo(15)-O(64)  | 1.856(5)   | Mo(30)-O(93)  | 2.087(6)   | Co(5)-O(69)   | 2.091(5)   |
| Mo(1)-Mo(3)  | 2.6095(9)  | Mo(15)-O(117) | 1.687(5)   | Mo(30)-O(103) | 1.878(6)   | Co(5)-O(78)#1 | 2.167(5)   |
| Mo(1)-O(6)   | 1.991(5)   | Mo(15)-O(167) | 1.873(6)   | Mo(30)-O(146) | 1.679(7)   | Co(5)-O(122)  | 1.988(7)   |
| Mo(1)-O(8)   | 2.154(5)   | Mo(15)-O(175) | 2.068(5)   | Mo(30)-O(149) | 2.066(6)   | Co(5)-O(132)  | 2.089(6)   |
| Mo(1)-O(14)  | 2.275(5)   | Mo(16)-O(30)  | 1.954(5)   | Mo(31)-O(59)  | 2.151(6)   | Co(6)-O(86)   | 2.056(7)   |
| Mo(1)-O(16)  | 1.944(5)   | Mo(16)-O(50)  | 1.950(5)   | Mo(31)-O(97)  | 2.049(6)   | Co(6)-O(96)   | 2.051(6)   |
| Mo(1)-O(22)  | 1.918(5)   | Mo(16)-O(81)  | 2.057(5)   | Mo(31)-O(98)  | 1.852(6)   | Co(6)-O(110)  | 2.155(6)   |
| Mo(1)-O(76)  | 1.685(5)   | Mo(16)-O(85)  | 2.020(6)   | Mo(31)-O(135) | 1.881(6)   | Co(6)-O(125)  | 2.199(6)   |
| Mo(2)-Mo(7)  | 2.6058(9)  | Mo(16)-O(138) | 1.678(6)   | Mo(31)-O(136) | 2.032(7)   | Co(6)-O(127)  | 2.003(7)   |
| Mo(2)-O(13)  | 2.254(5)   | Mo(16)-O(170) | 2.465(6)   | Mo(31)-O(155) | 1.690(6)   | Co(6)-O(180)  | 2.162(6)   |
| Mo(2)-O(18)  | 1.942(5)   | Mo(17)-O(5)   | 2.112(5)   | Mo(32)-O(60)  | 2.263(6)   | P(1)-O(8)     | 1.514(5)   |
| Mo(2)-O(22)  | 1.930(5)   | Mo(17)-O(19)  | 1.999(5)   | Mo(32)-O(105) | 2.075(6)   | P(1)-O(11)    | 1.551(5)   |
| Mo(2)-O(24)  | 1.980(5)   | Mo(17)-O(48)  | 2.402(5)   | Mo(32)-O(112) | 1.968(6)   | P(1)-O(17)    | 1.530(5)   |
| Mo(2)-O(29)  | 2.151(5)   | Mo(17)-O(70)  | 1.826(5)   | Mo(32)-O(134) | 1.688(6)   | P(1)-O(52)    | 1.531(5)   |

|               |           |               |          |                 |          |            |          |
|---------------|-----------|---------------|----------|-----------------|----------|------------|----------|
| Mo(2)-O(77)   | 1.686(5)  | Mo(17)-O(118) | 1.695(6) | Mo(32)-O(163)   | 1.869(6) | P(2)-O(1)  | 1.522(6) |
| Mo(3)-O(6)    | 1.974(5)  | Mo(17)-O(175) | 1.803(6) | Mo(32)-O(174)   | 1.888(6) | P(2)-O(2)  | 1.516(5) |
| Mo(3)-O(16)   | 1.962(5)  | Mo(18)-O(9)   | 2.409(5) | Mo(33)-O(83)    | 2.409(5) | P(2)-O(9)  | 1.563(5) |
| Mo(3)-O(25)   | 2.278(5)  | Mo(18)-O(75)  | 2.031(5) | Mo(33)-O(99)    | 2.051(6) | P(2)-O(12) | 1.538(5) |
| Mo(3)-O(43)   | 2.068(5)  | Mo(18)-O(82)  | 2.030(5) | Mo(33)-O(105)   | 1.789(7) | P(3)-O(10) | 1.517(5) |
| Mo(3)-O(54)   | 2.106(5)  | Mo(18)-O(94)  | 1.819(5) | Mo(33)-O(123)   | 2.077(6) | P(3)-O(15) | 1.560(5) |
| Mo(3)-O(114)  | 1.682(6)  | Mo(18)-O(104) | 1.840(6) | Mo(33)-O(171)   | 1.689(6) | P(3)-O(29) | 1.518(5) |
| Mo(4)-O(2)    | 2.153(5)  | Mo(18)-O(130) | 1.675(6) | Mo(33)-O(176)   | 1.812(6) | P(3)-O(65) | 1.527(5) |
| Mo(4)-O(10)   | 2.042(5)  | Mo(19)-O(12)  | 2.285(5) | Mo(34)-O(69)    | 1.944(6) | P(4)-O(3)  | 1.518(5) |
| Mo(4)-O(28)   | 1.882(5)  | Mo(19)-O(28)  | 1.882(5) | Mo(34)-O(96)    | 1.975(6) | P(4)-O(4)  | 1.527(5) |
| Mo(4)-O(35)   | 1.993(5)  | Mo(19)-O(51)  | 1.892(5) | Mo(34)-O(119)   | 2.282(6) | P(4)-O(31) | 1.543(5) |
| Mo(4)-O(38)   | 1.913(5)  | Mo(19)-O(53)  | 2.025(5) | Mo(34)-O(144)   | 1.668(6) | P(4)-O(48) | 1.569(5) |
| Mo(4)-O(74)   | 1.697(5)  | Mo(19)-O(94)  | 2.017(6) | Mo(34)-O(153)#1 | 2.068(7) | P(5)-O(13) | 1.507(5) |
| Mo(5)-Mo(6)   | 2.5980(9) | Mo(19)-O(109) | 1.667(6) | Mo(34)-O(164)   | 2.101(6) | P(5)-O(26) | 1.560(6) |
| Mo(5)-O(21)   | 1.967(5)  | Mo(20)-O(23)  | 2.147(5) | Mo(35)-O(101)   | 2.288(6) | P(5)-O(27) | 1.535(5) |
| Mo(5)-O(36)   | 1.957(5)  | Mo(20)-O(42)  | 2.083(5) | Mo(35)-O(135)   | 1.889(6) | P(5)-O(44) | 1.518(6) |
| Mo(5)-O(56)   | 2.110(5)  | Mo(20)-O(92)  | 1.880(6) | Mo(35)-O(137)   | 1.956(6) | P(6)-O(32) | 1.526(5) |
| Mo(5)-O(58)   | 2.289(5)  | Mo(20)-O(106) | 2.040(6) | Mo(35)-O(147)   | 1.858(6) | P(6)-O(37) | 1.558(6) |
| Mo(5)-O(72)#1 | 2.077(5)  | Mo(20)-O(173) | 1.680(6) | Mo(35)-O(151)   | 1.687(6) | P(6)-O(42) | 1.547(6) |
| Mo(5)-O(120)  | 1.682(5)  | Mo(20)-O(174) | 1.885(6) | Mo(35)-O(166)   | 2.068(7) | P(6)-O(58) | 1.524(5) |
| Mo(6)-O(21)   | 1.980(5)  | Mo(21)-O(12)  | 2.270(5) | Mo(36)-O(60)    | 2.294(6) | P(7)-O(56) | 1.530(6) |
| Mo(6)-O(32)   | 2.253(5)  | Mo(21)-O(33)  | 1.882(6) | Mo(36)-O(102)   | 1.880(6) | P(7)-O(63) | 1.511(5) |
| Mo(6)-O(34)   | 1.911(5)  | Mo(21)-O(53)  | 2.036(6) | Mo(36)-O(112)   | 1.953(6) | P(7)-O(84) | 1.541(5) |
| Mo(6)-O(36)   | 1.952(5)  | Mo(21)-O(104) | 2.033(6) | Mo(36)-O(145)   | 1.681(6) | P(7)-O(91) | 1.580(5) |
| Mo(6)-O(49)   | 2.148(6)  | Mo(21)-O(129) | 1.689(5) | Mo(36)-O(147)   | 1.878(6) | P(8)-O(43) | 1.521(5) |
| Mo(6)-O(89)   | 1.686(5)  | Mo(21)-O(161) | 1.884(6) | Mo(36)-O(176)   | 2.049(6) | P(8)-O(72) | 1.510(6) |

|                 |            |               |            |                 |            |              |          |
|-----------------|------------|---------------|------------|-----------------|------------|--------------|----------|
| Mo(7)-O(18)     | 1.961(5)   | Mo(22)-O(31)  | 2.284(5)   | Mo(37)-O(86)    | 2.160(6)   | P(8)-O(78)   | 1.521(5) |
| Mo(7)-O(24)     | 1.971(5)   | Mo(22)-O(51)  | 1.847(5)   | Mo(37)-O(90)    | 2.437(6)   | P(8)-O(140)  | 1.583(6) |
| Mo(7)-O(44)     | 2.296(5)   | Mo(22)-O(66)  | 1.904(5)   | Mo(37)-O(110)   | 1.974(7)   | P(9)-O(5)    | 1.564(5) |
| Mo(7)-O(71)     | 2.107(5)   | Mo(22)-O(73)  | 2.072(5)   | Mo(37)-O(136)   | 1.792(7)   | P(9)-O(14)   | 1.511(5) |
| Mo(7)-O(95)     | 1.683(6)   | Mo(22)-O(88)  | 1.935(6)   | Mo(37)-O(139)   | 1.808(6)   | P(9)-O(25)   | 1.520(6) |
| Mo(7)-O(162)    | 2.065(6)   | Mo(22)-O(172) | 1.678(6)   | Mo(37)-O(148)   | 1.693(6)   | P(9)-O(40)   | 1.545(5) |
| Mo(8)-O(3)      | 2.157(5)   | Mo(23)-O(48)  | 2.404(5)   | Mo(38)-Mo(38)#1 | 2.5639(17) | P(10)-O(46)  | 1.510(6) |
| Mo(8)-O(17)     | 2.034(5)   | Mo(23)-O(55)  | 2.041(6)   | Mo(38)-O(125)   | 1.954(6)   | P(10)-O(54)  | 1.529(5) |
| Mo(8)-O(38)     | 1.827(5)   | Mo(23)-O(70)  | 2.031(6)   | Mo(38)-O(125)#1 | 1.954(7)   | P(10)-O(67)  | 1.532(6) |
| Mo(8)-O(45)     | 2.061(5)   | Mo(23)-O(73)  | 1.799(6)   | Mo(38)-O(131)#1 | 2.000(6)   | P(10)-O(79)  | 1.574(6) |
| Mo(8)-O(66)     | 1.874(5)   | Mo(23)-O(87)  | 1.813(6)   | Mo(38)-O(156)   | 2.480(8)   | P(11)-O(20)  | 1.519(6) |
| Mo(8)-O(108)    | 1.697(5)   | Mo(23)-O(107) | 1.690(5)   | Mo(38)-O(158)   | 1.671(6)   | P(11)-O(23)  | 1.526(6) |
| Mo(9)-O(11)     | 2.137(5)   | Mo(24)-O(37)  | 2.111(5)   | Mo(38)-O(165)   | 2.067(7)   | P(11)-O(60)  | 1.541(5) |
| Mo(9)-O(19)     | 1.977(5)   | Mo(24)-O(83)  | 2.412(5)   | Mo(39)-O(90)    | 2.397(5)   | P(11)-O(83)  | 1.565(6) |
| Mo(9)-O(45)     | 1.804(5)   | Mo(24)-O(99)  | 1.826(6)   | Mo(39)-O(116)   | 2.047(7)   | P(12)-O(49)  | 1.517(6) |
| Mo(9)-O(48)     | 2.400(5)   | Mo(24)-O(106) | 1.798(6)   | Mo(39)-O(126)   | 1.807(6)   | P(12)-O(57)  | 1.521(5) |
| Mo(9)-O(55)     | 1.829(5)   | Mo(24)-O(111) | 1.981(6)   | Mo(39)-O(139)   | 2.083(7)   | P(12)-O(62)  | 1.552(6) |
| Mo(9)-O(113)    | 1.681(5)   | Mo(24)-O(152) | 1.687(6)   | Mo(39)-O(166)   | 1.804(7)   | P(12)-O(85)  | 1.534(6) |
| Mo(10)-O(1)     | 2.159(5)   | Mo(25)-Mo(34) | 2.5873(11) | Mo(39)-O(177)   | 1.681(6)   | P(13)-O(71)  | 1.524(6) |
| Mo(10)-O(27)    | 2.081(5)   | Mo(25)-O(34)  | 1.918(6)   | Mo(40)-O(90)    | 2.377(6)   | P(13)-O(80)  | 1.515(6) |
| Mo(10)-O(33)    | 1.876(6)   | Mo(25)-O(69)  | 1.956(6)   | Mo(40)-O(110)   | 1.987(7)   | P(13)-O(81)  | 1.534(6) |
| Mo(10)-O(47)    | 2.024(5)   | Mo(25)-O(96)  | 1.967(6)   | Mo(40)-O(116)   | 1.840(6)   | P(13)-O(159) | 1.572(5) |
| Mo(10)-O(64)    | 1.916(5)   | Mo(25)-O(133) | 1.693(6)   | Mo(40)-O(149)   | 1.789(6)   | P(14)-O(61)  | 1.521(6) |
| Mo(10)-O(115)   | 1.674(5)   | Mo(25)-O(169) | 2.281(5)   | Mo(40)-O(154)   | 1.699(7)   | P(14)-O(153) | 1.533(6) |
| Mo(11)-Mo(11)#1 | 2.5704(13) | Mo(25)-O(179) | 2.145(6)   | Mo(40)-O(180)   | 2.096(6)   | P(14)-O(157) | 1.561(7) |
| Mo(11)-O(7)#1   | 1.951(5)   | Mo(26)-O(31)  | 2.247(5)   | Co(1)-O(5)      | 2.131(5)   | P(14)-O(162) | 1.534(6) |

|                |           |               |          |              |          |              |          |
|----------------|-----------|---------------|----------|--------------|----------|--------------|----------|
| Mo(11)-O(7)    | 1.944(5)  | Mo(26)-O(87)  | 2.095(6) | Co(1)-O(6)   | 2.048(5) | P(15)-O(39)  | 1.524(6) |
| Mo(11)-O(52)   | 2.013(5)  | Mo(26)-O(88)  | 1.959(6) | Co(1)-O(7)   | 2.162(5) | P(15)-O(59)  | 1.538(7) |
| Mo(11)-O(67)#1 | 2.054(5)  | Mo(26)-O(141) | 1.668(6) | Co(1)-O(11)  | 2.072(5) | P(15)-O(90)  | 1.573(6) |
| Mo(11)-O(124)  | 1.672(5)  | Mo(26)-O(161) | 1.855(6) | Co(1)-O(19)  | 2.150(5) | P(15)-O(101) | 1.534(6) |
| Mo(12)-O(9)    | 2.411(5)  | Mo(26)-O(167) | 1.897(6) | Co(1)-O(46)  | 1.980(5) | P(16)-O(93)  | 1.536(7) |
| Mo(12)-O(26)   | 2.098(5)  | Mo(27)-O(62)  | 2.167(5) | Co(2)-O(15)  | 2.062(5) | P(16)-O(119) | 1.520(6) |
| Mo(12)-O(41)   | 1.982(5)  | Mo(27)-O(83)  | 2.417(6) | Co(2)-O(24)  | 2.061(5) | P(16)-O(169) | 1.494(6) |
| Mo(12)-O(47)   | 1.808(5)  | Mo(27)-O(111) | 1.953(6) | Co(2)-O(26)  | 2.173(5) | P(16)-O(180) | 1.567(6) |
| Mo(12)-O(75)   | 1.817(6)  | Mo(27)-O(123) | 1.799(6) | Co(2)-O(41)  | 2.157(5) | P(17)-O(86)  | 1.546(7) |
| Mo(12)-O(100)  | 1.688(5)  | Mo(27)-O(168) | 1.690(6) | Co(2)-O(50)  | 2.198(5) | P(17)-O(97)  | 1.512(7) |
| Mo(13)-Mo(16)  | 2.5563(9) | Mo(27)-O(178) | 1.820(6) | Co(2)-O(80)  | 1.961(5) | P(17)-O(131) | 1.535(6) |
| Mo(13)-O(30)   | 1.959(5)  | Mo(28)-O(20)  | 2.145(6) | Co(3)-O(16)  | 2.098(5) | P(17)-O(179) | 1.526(6) |
| Mo(13)-O(50)   | 1.953(5)  | Mo(28)-O(57)  | 2.051(5) | Co(3)-O(18)  | 2.093(5) | P(18)-O(127) | 1.515(6) |
| Mo(13)-O(65)   | 2.018(5)  | Mo(28)-O(98)  | 1.875(6) | Co(3)-O(61)  | 2.145(5) | P(18)-O(142) | 1.561(7) |
| Mo(13)-O(84)   | 2.062(5)  | Mo(28)-O(102) | 1.885(6) | Co(3)-O(78)  | 2.154(5) | P(18)-O(164) | 1.527(6) |
| Mo(13)-O(128)  | 1.669(6)  | Mo(28)-O(143) | 1.681(6) | Co(3)-O(121) | 2.023(6) | P(18)-O(165) | 1.535(7) |

---

Symmetry code: #1, -x+1,y,-z+3/2

**Table S4.** Selected hydrogen bonding geometry (Å, °) for compound **1**.

| D–H···A       | D–H  | H···A | D···A | D–H···A |
|---------------|------|-------|-------|---------|
| N1–H1A···O45  | 0.88 | 2.16  | 2.987 | 156     |
| N2–H2A···O106 | 0.88 | 2.52  | 3.018 | 117     |
| N7–H7A···O116 | 0.88 | 1.93  | 2.775 | 161     |
| N8–H8A···O138 | 0.88 | 2.10  | 2.927 | 155     |

**Table S5.** BVS values for Pb, Mo, and Co atoms in **1**.

| Atom | BVS   | Atom | BVS   | Atom | BVS   | Atom | BVS   |
|------|-------|------|-------|------|-------|------|-------|
| Pb1  | 1.545 | Mo5  | 5.131 | Mo17 | 5.973 | Mo29 | 5.895 |
| Pb2  | 1.529 | Mo6  | 5.433 | Mo18 | 6.022 | Mo30 | 5.781 |
| Co1  | 2.029 | Mo7  | 5.129 | Mo19 | 5.850 | Mo31 | 5.951 |
| Co2  | 1.994 | Mo8  | 5.986 | Mo20 | 5.838 | Mo32 | 5.834 |
| Co3  | 1.959 | Mo9  | 6.025 | Mo21 | 5.726 | Mo33 | 6.027 |
| Co4  | 1.987 | Mo10 | 5.790 | Mo22 | 5.970 | Mo34 | 5.241 |
| Co5  | 1.970 | Mo11 | 5.319 | Mo23 | 6.085 | Mo35 | 5.877 |
| Co6  | 2.009 | Mo12 | 6.065 | Mo24 | 6.040 | Mo36 | 5.918 |
| Mo1  | 5.368 | Mo13 | 5.246 | Mo25 | 5.371 | Mo37 | 6.034 |
| Mo2  | 5.396 | Mo14 | 5.999 | Mo26 | 5.949 | Mo38 | 5.290 |
| Mo3  | 5.143 | Mo15 | 5.868 | Mo27 | 6.028 | Mo39 | 6.049 |
| Mo4  | 5.811 | Mo16 | 5.259 | Mo28 | 5.924 | Mo40 | 6.012 |

**Table S6.** Comparison of POM-based crystalline heterogeneous catalytic systems for methyl phenyl sulfide oxidation.

| Catalyst                                                                               | Time (h) | Conv. (%) | Sel. (%) <sup>a</sup> | Ref.      |
|----------------------------------------------------------------------------------------|----------|-----------|-----------------------|-----------|
| <b>Compound1</b>                                                                       | 1.33     | 99.1      | 98.7                  | This work |
| [Co <sub>2</sub> L <sub>0.5</sub> V <sub>4</sub> O <sub>12</sub> ]                     | 4        | 99        | 100                   | S6        |
| {Ni <sub>4</sub> Se <sub>7</sub> V <sub>10</sub> }                                     | 1        | 96.4      | 100                   | S7        |
| [V <sub>8</sub> O <sub>12</sub> (CH <sub>3</sub> O) <sub>4</sub> (DAC) <sub>4</sub> ]  | 8        | 90        | 97.8                  | S8        |
| [Co(HDTBA)V <sub>2</sub> O <sub>6</sub> ]                                              | 0.25     | 98        | 98                    | S9        |
| [Ni(DTBA) <sub>2</sub> V <sub>2</sub> O <sub>6</sub> ]                                 |          | 100       | 98                    |           |
| {Ru <sub>3</sub> (trz) <sub>6</sub> As <sub>4</sub> W <sub>42</sub> }                  | 1        | 95.1      | 99                    | S10       |
| {Ru <sub>3</sub> (trz) <sub>6</sub> As <sub>2</sub> W <sub>21</sub> }                  |          | 68.2      | 99                    |           |
| {Mn <sub>6</sub> Se <sub>8</sub> V <sub>20</sub> }                                     | 1        | 96.2      | 97.8                  | S11       |
| {Co <sub>6</sub> Se <sub>8</sub> V <sub>20</sub> }                                     |          | 98.8      | 97.9                  |           |
| {Zn <sub>6</sub> Se <sub>8</sub> V <sub>20</sub> }                                     |          | 96.5      | 97.8                  |           |
| [Ni <sub>2</sub> (1-vIM) <sub>7</sub> ][V <sub>4</sub> O <sub>12</sub> ]               | 4        | 96.8      | 98.7                  | S12       |
| [Cu <sub>2</sub> (1-vIM) <sub>8</sub> ][V <sub>4</sub> O <sub>12</sub> ]               |          | 98.8      | 96.5                  |           |
| [Co(1-vIM)][VO <sub>3</sub> ] <sub>2</sub>                                             |          | 91.5      | 98.5                  |           |
| [Co <sub>4</sub> (1-vIM) <sub>14</sub> ][V <sub>4</sub> O <sub>12</sub> ] <sub>2</sub> |          | 98.2      | 96.8                  |           |
| [Co][PMo <sub>6</sub> (PABA) <sub>3</sub> ] <sub>2</sub>                               | 0.33     | 99.5      | 98                    | S13       |
| [Mn][PMo <sub>6</sub> (PABA) <sub>3</sub> ] <sub>2</sub>                               |          | 96.3      | 97.1                  |           |
| [Ni][PMo <sub>6</sub> (PABA) <sub>3</sub> ] <sub>2</sub>                               |          | 98.3      | 97.6                  |           |

|                                                                                                                                              |     |      |      |     |
|----------------------------------------------------------------------------------------------------------------------------------------------|-----|------|------|-----|
| [Zn][PMo <sub>6</sub> (PABA) <sub>3</sub> ] <sub>2</sub>                                                                                     |     | 97.3 | 97.4 |     |
| [Cu <sub>3</sub> (ptz) <sub>4</sub> ][Co <sub>2</sub> Mo <sub>10</sub> ]                                                                     |     | 99   | 100  |     |
| [Cu(bim) <sub>2</sub> ] <sub>2</sub> [Co <sub>2</sub> Mo <sub>10</sub> ]                                                                     | 4   | 98.4 | 95.2 | S14 |
| [{Cu <sub>2</sub> (dpdo) <sub>3</sub> ] <sub>2</sub> {Co <sub>2</sub> Mo <sub>10</sub> }                                                     |     | 94.8 | 95.1 |     |
| (H <sub>2</sub> bpp) <sub>4</sub> {CuCo <sub>4</sub> Mo <sub>20</sub> }                                                                      |     | 96.7 | 96.3 |     |
| {[Cu <sub>8</sub> (dpyh) <sub>4</sub> ]( $\alpha$ - $\gamma$ -Mo <sub>8</sub> O <sub>26</sub> )}( $\beta$ -Mo <sub>8</sub> O <sub>26</sub> ) | 0.5 | 99   | 99   | S15 |

<sup>a</sup>Selectivity to methyl phenyl sulfoxide.

**Table S7.** Oxidation of methyl phenyl sulfide to methyl phenyl sulfoxide catalyzed by compound **1** under different solvents<sup>a</sup>.

| Entry | Solvent (3 mL)  | Conv. (%) | Sel. (%) <sup>b</sup> |
|-------|-----------------|-----------|-----------------------|
| 1     | EtOH            | 99.1      | 98.7                  |
| 2     | MeOH            | 72.8      | >99                   |
| 3     | MeCN            | 24.3      | 100                   |
| 4     | 1,4-Dioxane     | 73.4      | 98.6                  |
| 5     | dichloromethane | 50.2      | 80.2                  |

<sup>a</sup>Reaction conditions: 0.5 mmol of MPS; 0.3  $\mu$ mol of catalyst; 0.65 mmol of TBHP; reaction temperature 60 °C, reaction time 80 min, and under nitrogen atmosphere. <sup>b</sup>Selectivity to sulfoxides, the byproduct was sulfone.

**Table S8.** Catalytic oxidation of methyl phenyl sulfide with different catalysts<sup>a</sup>.

| Entry | Catal.                                                                                                                                  | Conv. (%) | Sel. (%) <sup>b</sup> |
|-------|-----------------------------------------------------------------------------------------------------------------------------------------|-----------|-----------------------|
| 1     | Compound 1                                                                                                                              | 99.1      | 98.7                  |
| 2     | Na <sub>2</sub> MoO <sub>4</sub> ·2H <sub>2</sub> O                                                                                     | 75.1      | 87.3                  |
| 3     | CoCl <sub>2</sub> ·6H <sub>2</sub> O                                                                                                    | 55.4      | 93.5                  |
| 4     | Pb(OAc) <sub>2</sub> ·3H <sub>2</sub> O                                                                                                 | 18.1      | 99.3                  |
| 5     | biz                                                                                                                                     | 16.9      | 99.5                  |
| 6     | Na <sub>2</sub> MoO <sub>4</sub> ·2H <sub>2</sub> O+ CoCl <sub>2</sub> ·6H <sub>2</sub> O+ Pb(OAc) <sub>2</sub> ·3H <sub>2</sub> O+ biz | 71.5      | 86.2                  |

<sup>a</sup>Reaction conditions: 0.5 mmol of sulfide; 0.3  $\mu$ mol of catalyst; 3 ml of EtOH; 0.65 mmol of TBHP; reaction temperature 60 °C, reaction time 80 min, and under nitrogen atmosphere. <sup>b</sup>Selectivity to sulfoxides, the byproduct was sulfone.

**Table S9.** ICP-MS analysis of the filtrate after the removal of the catalyst.

| Entry | Test element | Element concentration of the test solution ( $\mu$ g/L) |
|-------|--------------|---------------------------------------------------------|
| 1     | Mo           | 12.483                                                  |
| 2     | Co           | 1.872                                                   |
| 3     | Pb           | 0.624                                                   |

**Table S10.** Selective oxidation of various sulfides to sulfoxide<sup>a</sup>.

| Entry | Substrate                                                                           | Temp.(°C) | Time(min) | Conv. (%) | Sel. (%) <sup>b</sup> |
|-------|-------------------------------------------------------------------------------------|-----------|-----------|-----------|-----------------------|
| 1     | 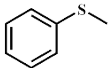 | 60        | 80        | 99.1      | 98.7                  |

|                |                                                                                   |    |    |      |      |
|----------------|-----------------------------------------------------------------------------------|----|----|------|------|
| 2              | 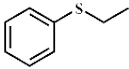 | 60 | 80 | 98.9 | 90.4 |
| 3              |  | 60 | 80 | 99.1 | 93.9 |
| 4              |  | 60 | 80 | 93.1 | 96.8 |
| 5              |  | 60 | 80 | 98.8 | 96.1 |
| 6              |  | 60 | 80 | 96.7 | 98.4 |
| 7 <sup>b</sup> |  | 60 | 80 | 99.1 | 99.0 |
| 8              |  | 60 | 80 | 97.8 | 98.6 |

<sup>a</sup>Reaction conditions: 0.5 mmol of sulfide; 0.3  $\mu$ mol of catalyst; 3 ml of EtOH; 0.65 mmol of TBHP; reaction temperature 60 °C, reaction time 80 min, and under nitrogen atmosphere.

<sup>b</sup>Selectivity to sulfoxides, the by product was sulfone.

## References

- S1. M. Sheldrick, *University of Göttingen*, 1990, **46**.
- S2. G. Sheldrick, *Acta Crystallographica Section A*, 2008, **64**, 112
- S3. G. Sheldrick, *Acta Crystallographica Section A*. 2015, **71**, 3
- S4. J. Lin, N. Li, S. Yang, M. Jia, J. Liu, X. M. Li, L. An, Q. Tian, L. Z. Dong and Y. Q. Lan, *J. Am. Chem. Soc.*, 2020, **142**, 13982
- S5. H. Xu, S. You, Z. Lang, Y. Sun, C. Sun, J. Zhou, X. Wang, Z. Kang and Z. Su, *CHEM-EUR. J.*, 2020, **26**, 2735
- S6. B. B. Lu, J. Yang, Y. Y. Liu and J. F. Ma, *Inorg. Chem.*, 2017, **56**, 11710
- S7. J. Liu, Z. Deng, Q. Xu, R. Wan, P. Ma, J. Niu and J. Wang, *Inorg. Chem. Commun.*, 2021, **124**, 108407
- S8. J. Tang, P.-F. Yao, X.-L. Xu, H.-Y. Li, F.-P. Huang, Q.-Q. Nie, M.-Y. Luo, Q. Yu and H.-D. Bian, *RSC Adv.*, 2016, **6**, 44154
- S9. X. Wang, T. Zhang, Y. Li, J. Lin, H. Li and X. L. Wang, *Inorg. Chem.*, 2020, **59**, 17583
- S10. H. Li, P. He, R. Wan, Y. Zou, X. Zhao, P. Ma, J. Niu and J. Wang, *Dalton Trans.*, 2020, **49**, 2895
- S11. R. Wan, Z. Jing, Q. Xu, X. Ma, P. Ma, C. Zhang, J. Niu and J. Wang, *Inorg. Chem.*, 2021, **60**, 2888
- S12. J. Li, C. Wei, D. Guo, C. Wang, Y. Han, G. He, J. Zhang, X. Huang and C. Hu, *Dalton Trans.*, 2020, **49**, 14148
- S13. H. Y. An, Y. J. Hou, S. Z. Chang, J. Zhang and Q. S. Zhu, *Inorg. Chem. Front.*, 2020, **7**, 169
- S14. H. Y. An, Y. J. Hou, L. Wang, Y. M. Zhang, W. Yang and S. Z. Chang, *Inorg. Chem.* 2017, **56**, 11619
- S15. X. L. Wang, J. Y. Zhang, Z. H. Chang, Z. Zhang, X. Wang, H. Y. Lin and Z. W. Cui,
